# Supplementary material for: Synthesis of chiloglottones – semiochemicals from sexually deceptive orchids and their pollinators
Source: Royal Society of Chemistry journal article supplement (doi:10.1039/b912233h), 2009-01-01
Supplement: b912233h.pdf [file b912233h.pdf]

# Synthesis of chiloglottones – semiochemicals from sexually deceptive orchids and their pollinators

*Jacqueline Poldy,<sup>†</sup> Rod Peakall<sup>‡</sup> and Russell A. Barrow<sup>†,\*</sup>*

<sup>†</sup>Research School of Chemistry, The Australian National University, Canberra, ACT 0200, Australia.

<sup>‡</sup>School of Biology, The Australian National University, Canberra, ACT 0200, Australia.

[\\*rab@anu.edu.au](mailto:*rab@anu.edu.au)

## Supporting Information Index

|                                                                                                |    |
|------------------------------------------------------------------------------------------------|----|
| <b>Representative Procedure and characterization data for 2b-f</b>                             | 2  |
| <b>Representative Procedure and characterization data for 3b-f</b>                             | 4  |
| <b>Representative Procedure and characterization data for 4b-f</b>                             | 6  |
| <b>Representative Procedure for synthesis of 5</b>                                             | 9  |
| <b>Representative Procedure and characterization data for 1da-dg, 1fc and 1be</b>              | 9  |
| <b><sup>1</sup>H NMR and <sup>13</sup>C NMR spectra of new compounds and natural products:</b> |    |
| <b>1da-dg, 1fc and 1be and 4c-e</b>                                                            | 16 |

**Representative Procedure for preparation of 2.** Reductive alkylations were performed with adaptations to published procedures.<sup>1,2</sup> To a solution of 3,5-dimethoxybenzoic acid (1 equiv.) in dry THF (2 mL/mmol) liquid NH<sub>3</sub> (approx. 5 mL/mmol) was condensed. Lithium (2.2 equiv.) was added in portions at -33°C until a deep blue color persisted. The appropriate alkyl halide (1.2 equiv.) was added dropwise, causing an immediate reversion of the color change through orange to colorless. NH<sub>3</sub> was evaporated under a stream of N<sub>2</sub> overnight. The residue was partitioned between Et<sub>2</sub>O and H<sub>2</sub>O, the aqueous layer chilled to 0°C and acidified to pH 3-4 with careful addition of 2N HCl. The aqueous layer was reextracted (EtOAc), the organic phase washed (H<sub>2</sub>O), dried (MgSO<sub>4</sub>) and concentrated *in vacuo*. The solid residue was recrystallized from CH<sub>2</sub>Cl<sub>2</sub> to return the diene acid **2**.

**3,5-dimethoxy-1-methylcyclohexa-2,5-dienecarboxylic acid (2b)**

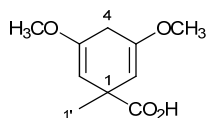

Yield = 79% as colorless prisms. IR (neat): br. 3430, 1724, 1600 cm<sup>-1</sup>; <sup>1</sup>H NMR (300 MHz, CDCl<sub>3</sub>): δ 4.71 (2H, *dd*, <sup>4</sup>*J* = 1.5, <sup>4</sup>*J* = 1.5, H-2,6), 3.59 (6H, *s*, 3,5-OCH<sub>3</sub>), 2.82 (1H, *dt*, <sup>2</sup>*J* = 20.7, <sup>4</sup>*J* = 1.5, H-4a), 2.73 (1H, *dt*, <sup>2</sup>*J* = 20.7, <sup>4</sup>*J* = 1.5, H-4b), 1.41 (3H, *s*, H-1'); <sup>13</sup>C APT NMR (75 MHz, CDCl<sub>3</sub>): δ 172.2 (C, 1-CO<sub>2</sub>H), 152.7 (C, C-3,5), 96.4 (CH, C-2,6), 54.4 (CH<sub>3</sub>, 3,5-OCH<sub>3</sub>), 45.8 (C, C-1), 30.9 (CH<sub>2</sub>, C-4), 29.0 (CH<sub>3</sub>, C-1'); *m/z* (ESI) 199.0963 [(M+H)<sup>+</sup>C<sub>10</sub>H<sub>15</sub>O<sub>4</sub> requires 199.0970 (Δ = 3.6 ppm)].

**3,5-dimethoxy-1-ethylcyclohexa-2,5-dienecarboxylic acid (2c)**

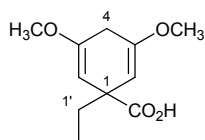

Yield = 78 % as colorless prisms. IR (neat): v. br. 3400, 2090, 1640 cm<sup>-1</sup>; <sup>1</sup>H NMR (300 MHz, CDCl<sub>3</sub>): δ 4.65 (2H, *dd*, <sup>4</sup>*J* = 1.2, <sup>4</sup>*J* = 1.2, H-2,6), 3.60 (6H, *s*, 3,5-OCH<sub>3</sub>), 2.77-2.66 (2H, *m*, H-4), 1.75 (2H, *q*,

$^3J = 7.5$ , H-1'), 0.82 (3H, *t*,  $^3J = 7.5$ , H-2');  $^{13}\text{C}$  APT NMR (75 MHz,  $\text{CDCl}_3$ ):  $\delta$  182.5 (C, 1-CO<sub>2</sub>H), 153.4 (C, C-3,5), 94.4 (CH, C-2,6), 54.4 (CH<sub>3</sub>, 3,5-OCH<sub>3</sub>), 50.3 (C, C-1), 33.7 (CH<sub>2</sub>, C-1'), 31.1 (CH<sub>2</sub>, C-4), 8.6 (CH<sub>3</sub>, C-2'); *m/z* (ESI) 213.1121 [(M+H)<sup>+</sup> C<sub>11</sub>H<sub>17</sub>O<sub>4</sub> requires 213.1127 ( $\Delta = 2.8$  ppm)].

### 3,5-dimethoxy-1-propylcyclohexa-2,5-dienecarboxylic acid (2d)

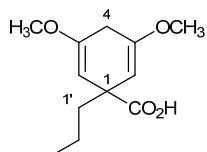

Yield = 99% as colorless prisms. IR (neat): v. br. 3400, 2090, 1643  $\text{cm}^{-1}$ ;  $^1\text{H}$  NMR (300 MHz,  $\text{CDCl}_3$ ):  $\delta$  4.68 (2H, *s*, H-2,6), 3.60 (6H, *s*, 3,5-OCH<sub>3</sub>), 2.75 (2H, *s*, H-4), 1.73-1.67 (2H, *m*, H-1'), 1.31-1.20 (2H, *m*, H-2'), 0.90 (3H, *t*,  $^3J = 7.2$ , H-3');  $^{13}\text{C}$  APT NMR (75 MHz,  $\text{CDCl}_3$ ):  $\delta$  182.8 (C, CO<sub>2</sub>H), 153.0 (C, C-3,5), 94.8 (CH, C-2,6), 54.4 (CH<sub>3</sub>, 3,5-OCH<sub>3</sub>), 49.9 (C, C-1), 43.4 (CH<sub>2</sub>, C-1'), 31.1 (CH<sub>2</sub>, C-4), 17.6 (CH<sub>2</sub>, C-2'), 14.2 (CH<sub>3</sub>, C-3'); *m/z* (ESI) 227.1289 [(M+H)<sup>+</sup> C<sub>12</sub>H<sub>19</sub>O<sub>4</sub> requires 227.1283 ( $\Delta = 2.8$  ppm)].

### 3,5-dimethoxy-1-butylcyclohexa-2,5-dienecarboxylic acid (2e)

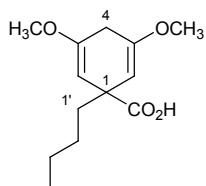

Yield = 77% as colorless prisms. IR (neat): v. br. 3400, 2090, 1640  $\text{cm}^{-1}$ ;  $^1\text{H}$  NMR (300 MHz,  $\text{CDCl}_3$ ):  $\delta$  4.68 (2H, *s*, H-2,6), 3.60 (6H, *s*, 3,5-OCH<sub>3</sub>), 2.76 (2H, *s*, H-4), 1.74-1.68 (2H, *m*, H-1'), 1.32-1.16 (4H, *m*, H-2' and H-3'), 1.70 (3H, *t*,  $^4J = 7.2$ , H-4');  $^{13}\text{C}$  APT NMR (75 MHz,  $\text{CDCl}_3$ ):  $\delta$  182.8 (C, CO<sub>2</sub>H), 153.1 (C, C-3,5), 94.9 (CH, C-2,6), 54.4 (CH<sub>3</sub>, 3,5-OCH<sub>3</sub>), 49.9 (C, C-1), 40.9 (CH<sub>2</sub>, C-1'), 31.1 (CH<sub>2</sub>, C-4), 26.4 (CH<sub>2</sub>, C-2'), 22.9 (CH<sub>2</sub>, C-3'), 14.0 (CH<sub>3</sub>, C-4'); *m/z* (ESI) 241.1437 [(M+H)<sup>+</sup> C<sub>13</sub>H<sub>21</sub>O<sub>4</sub> requires 241.1440 ( $\Delta = 1.2$  ppm)].

### 3,5-dimethoxy-1-pentylcyclohexa-2,5-dienecarboxylic acid (**2f**)

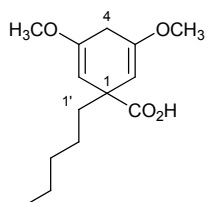

Yield = 44% as colorless prisms. IR (neat): v. br. 3400, 2090, 1643  $\text{cm}^{-1}$ ;  $^1\text{H}$  NMR (300 MHz,  $\text{CDCl}_3$ ):  $\delta$  4.67 (2H, *s*, H-2,6), 3.60 (6H, *s*, 3,5- $\text{OCH}_3$ ), 2.76 (2H, *s*, H-4), 1.73-1.68 (2H, *m*, H-1'), 1.32-1.15 (6H, *m*, H-2', H-3' and H-4'), 0.86 (3H, *t*,  $^3J = 7.2$ , H-5');  $^{13}\text{C}$  APT NMR (75 MHz,  $\text{CDCl}_3$ ):  $\delta$  182.8 (C, 1- $\text{CO}_2\text{H}$ ), 153.1 (C, C-3,5), 94.9 (CH, C-2,6), 54.4 ( $\text{CH}_3$ , 3,5- $\text{OCH}_3$ ), 49.9 (C, C-1), 41.0 ( $\text{CH}_2$ , C-1'), 32.0 ( $\text{CH}_2$ , C-3'), 31.1 ( $\text{CH}_2$ , C-4), 23.9 and 22.5 ( $\text{CH}_2$ , C-2' and C-4'), 14.0 ( $\text{CH}_3$ , C-5'); *m/z* (ESI) 255.1596 [(M+H) $^+$   $\text{C}_{14}\text{H}_{23}\text{O}_4$  requires 255.1596 ( $\Delta = 0.0$  ppm)].

**Representative Procedure for synthesis of 3:** Following a published account with minor modifications;<sup>1</sup> to a rapidly stirred solution of **2** (1 equiv.) in benzene (20 mL/mmol) was added  $\text{Pb}(\text{OAc})_4$  (1.3 equiv.). After 30-40 min, by which time the mixture had become colorless,  $\text{H}_2\text{O}$  (approx. equivolume to benzene) was added and the mixture filtered under vacuum through a plug of silica. The aqueous phase was extracted with  $\text{Et}_2\text{O}$  and the combined organic extracts washed (sat. aqueous  $\text{NaHCO}_3$  solution), dried ( $\text{MgSO}_4$ ) and the solvents removed *in vacuo* to give **3** as a pale mobile oil.

### 1,3-dimethoxy-5-methylbenzene (**3b**)

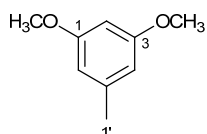

Yield = 91% as pale yellow oil: IR (neat): 2997, 2940, 2835, s. 1597, 1462, 1204, 1150, 829  $\text{cm}^{-1}$ ;  $^1\text{H}$  NMR: (300 MHz,  $\text{CDCl}_3$ ):  $\delta$  6.35 (2H, *d*,  $^4J = 2.1$ , H-4,6), 6.30 (1H, *t*,  $^4J = 2.1$ , H-2), 3.78 (6H, *s*, 1,3- $\text{OCH}_3$ ), 2.31 (3H, *s*, H-1');  $^{13}\text{C}$  NMR: (75 MHz,  $\text{CDCl}_3$ ):  $\delta$  160.7 (C, C-1,3), 140.2 (C, C-5), 107.0 (CH, C-4,6), 97.5 (CH, C-2), 55.2 ( $\text{CH}_3$ , 1,3- $\text{OCH}_3$ ), 21.8 ( $\text{CH}_3$ , C-1'); *m/z* (EI) 152.0833 [ $\text{M}^+$   $\text{C}_9\text{H}_{12}\text{O}_2$  requires 152.0837 ( $\Delta = 2.8$  ppm)].

### 1,3-dimethoxy-5-ethylbenzene (3c)

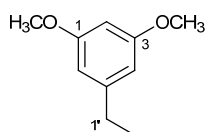

Yield = 94% as pale yellow oil: IR (neat): 2997, 2943, 2835, s. 1598, 1462, 1204, 1145, 829  $\text{cm}^{-1}$ ;  $^1\text{H}$  NMR (300 MHz,  $\text{CDCl}_3$ ):  $\delta$  6.37 (2H, *d*,  $^4J = 2.1$ , H-4,6), 6.30 (1H, *t*,  $^4J = 2.1$ , H-2), 3.79 (6H, *s*, 1,3- $\text{OCH}_3$ ), 2.60 (2H, *q*,  $^3J = 7.5$ , H-1'), 1.23 (3H, *t*,  $^3J = 7.5$ , H-2');  $^{13}\text{C}$  APT NMR (75 MHz,  $\text{CDCl}_3$ ):  $\delta$  160.7 (C, C-1,3), 146.7 (C, C-5), 105.9 (CH, C-4,6), 97.5 (CH, C-2), 55.2 ( $\text{CH}_3$ , 1,3- $\text{OCH}_3$ ), 29.2 ( $\text{CH}_2$ , C-1'), 15.4 ( $\text{CH}_3$ , C-2'); *m/z* (EI) 166.0992 [ $\text{M}^+$   $\text{C}_{10}\text{H}_{14}\text{O}_2$  requires 166.0994 ( $\Delta = 1.1$  ppm)].

### 1,3-dimethoxy-5-propylbenzene (3d)

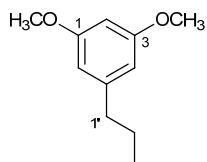

Yield = 99% as a pale yellow oil: IR (neat): 2997, 2959, 2832, s. 1597, 1462, 1204, 1150, 829  $\text{cm}^{-1}$ ;  $^1\text{H}$  NMR (300 MHz,  $\text{CDCl}_3$ ):  $\delta$  6.35 (2H, *d*,  $^4J = 2.1$ , H-4,6), 6.30 (1H, *t*,  $^4J = 2.1$ , H-2), 3.78 (6H, *s*, 1,3- $\text{OCH}_3$ ), 2.53 (2H, *t*,  $^3J = 7.5$ , H-1'), 1.63 (2H, *tq*,  $^3J = 7.5$ ,  $^3J = 7.5$ , H-2'), 1.23 (3H, *t*,  $^3J = 7.5$ , H-3');  $^{13}\text{C}$  NMR APT NMR (75 MHz,  $\text{CDCl}_3$ ):  $\delta$  160.6 (C, C-1,3), 145.1 (C, C-5), 106.5 (CH, C-4,6), 97.5 (CH, C-2), 55.2 ( $\text{CH}_3$ , 1,3- $\text{OCH}_3$ ), 38.4 ( $\text{CH}_2$ , C-1'), 24.3 ( $\text{CH}_2$ , C-2'), 13.9 ( $\text{CH}_3$ , C-3'); *m/z* (EI) 180.1149 [ $\text{M}^+$   $\text{C}_{11}\text{H}_{16}\text{O}_2$  requires 180.1150 ( $\Delta = 0.7$  ppm)].

### 1,3-dimethoxy-5-butylbenzene (3e)

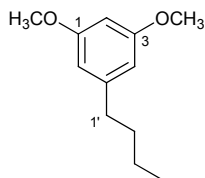

Yield = 88% as a pale yellow oil: IR (neat): 2995, 2950, 2835, s. 1595, 1462, 1205, 1150, 829  $\text{cm}^{-1}$ ;  $^1\text{H}$  NMR (300 MHz,  $\text{CDCl}_3$ ):  $\delta$  6.35 (2H, *d*,  $^4J = 2.1$ , H-4,6), 6.30 (1H, *t*,  $^4J = 2.1$ , H-2), 3.78 (6H, *s*, 1,3- $\text{OCH}_3$ ), 2.55 (2H, *t*,  $^3J = 7.5$ , H-1'), 1.59 (2H, *tt*,  $^3J = 7.5$ ,  $^3J = 7.5$ , H-2'), 1.23 (2H, *tq*,  $^3J = 7.5$ ,  $^3J = 7.2$ , H-3'), 0.93 (2H, *t*,  $^3J = 7.2$ , H-4');  $^{13}\text{C}$  NMR APT NMR (75 MHz,  $\text{CDCl}_3$ ):  $\delta$  160.6 (C, C-1,3), 145.4 (C, C-5), 106.4 (CH, C-4,6), 97.5 (CH, C-2), 55.2 ( $\text{CH}_3$ , 1,3- $\text{OCH}_3$ ), 36.0 ( $\text{CH}_2$ , C-1'), 33.4 ( $\text{CH}_2$ , C-2'), 22.4 ( $\text{CH}_2$ , C-3'), 13.9 ( $\text{CH}_3$ , C-4'); *m/z* (EI) 194.1307 [ $\text{M}^{+\bullet}$   $\text{C}_{12}\text{H}_{18}\text{O}_2$  requires 194.1307 ( $\Delta = 0.1$  ppm)].

### 1,3-dimethoxy-5-pentylbenzene (3f)

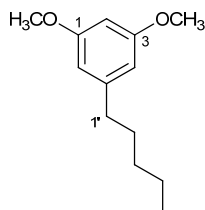

Yield = 84% as a clear colourless oil: IR (neat): 2997, 2959, 2835, s. 1602, 1462, 1198, 1149, 829  $\text{cm}^{-1}$ ;  $^1\text{H}$  NMR (300 MHz,  $\text{CDCl}_3$ ):  $\delta$  6.35 (2H, *d*,  $^4J = 2.4$ , H-4,6), 6.30 (1H, *t*,  $^4J = 2.4$ , H-2), 3.79 (6H, *s*, 1,3- $\text{OCH}_3$ ), 2.55 (2H, *t*,  $^3J = 7.5$ , H-1'), 1.61 (2H, *tt*,  $^3J = 7.5$ ,  $^3J = 7.5$ , H-2'), 1.35-1.30 (4H, *m*, H-3' and H-4'), 0.93 (2H, *t*,  $^3J = 7.2$ , H-5');  $^{13}\text{C}$  NMR APT NMR (75 MHz,  $\text{CDCl}_3$ ):  $\delta$  160.6 (C, C-1,3), 145.4 (C, C-5), 106.5 (CH, C-4,6), 97.5 (CH, C-2), 55.2 (1,3- $\text{OCH}_3$ ), 36.3 ( $\text{CH}_2$ , C-1'), 31.5 and 30.9 ( $\text{CH}_2$ , C-2' and C-3'), 22.5 ( $\text{CH}_2$ , C-4'), 14.0 ( $\text{CH}_3$ , C-5'); *m/z* (EI) 208.1460 [ $\text{M}^{+\bullet}$   $\text{C}_{13}\text{H}_{20}\text{O}_2$  requires 208.1463 ( $\Delta = 1.7$  ppm)].

**Representative Procedure for preparation of 4:** To a solution of **3** (1 equiv.) in dry THF (approx. 4.5 mL/mmol) and *t*BuOH (approx. 4.5 mL/mmol), NH<sub>3</sub> (approx. 10-15 mL/mmol) was condensed. Lithium (17 equiv.) was added in portions at -33°C and the solution allowed to warm slowly to r.t. NH<sub>3</sub> was evaporated under a stream of N<sub>2</sub> and the residue partitioned between Et<sub>2</sub>O and sat. aqueous NH<sub>4</sub>Cl solution. The aqueous was reextracted (Et<sub>2</sub>O), the combined organics dried (MgSO<sub>4</sub>) and concentrated under vacuum to return the diene **4**.

#### 1,5-dimethoxy-3-methylcyclohexa-1,4-diene (**4b**)

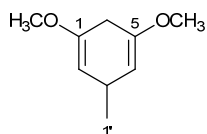

Yield = 61% as a pale yellow oil. IR (neat): 3000, 2955, 2865, s. 1600, 1382, 1205, 1150, 825 cm<sup>-1</sup>; <sup>1</sup>H NMR (300 MHz, CDCl<sub>3</sub>): δ 4.57 (2H, *ddd*, <sup>3</sup>*J* = 3.3, <sup>4</sup>*J* = 1.2, <sup>4</sup>*J* = 1.2, H-2,4), 3.56 (6H, *s*, 1,5-OCH<sub>3</sub>), 3.04 (1H, *qtdd*, <sup>3</sup>*J* = 6.9, <sup>3</sup>*J* = 3.3, <sup>5</sup>*J* = 6.9, <sup>5</sup>*J* = 6.9, H-3), 2.81-2.71 (2H, *m*, H-6), 1.08 (3H, *d*, <sup>3</sup>*J* = 6.9 H-1'); <sup>13</sup>C APT NMR (75 MHz, CDCl<sub>3</sub>): δ 151.2 (C, C-1,5), 97.7 (CH, C-2,4), 54.1 (CH<sub>3</sub>, 1,5-OCH<sub>3</sub>), 31.0 (CH<sub>2</sub>, C-6), 30.6 (CH, C-3), 24.5 (CH<sub>3</sub>, C-1'); *m/z* (EI) 154.0994 [M<sup>+</sup>• C<sub>9</sub>H<sub>14</sub>O<sub>2</sub> requires 154.0996 (Δ = 0.1 ppm)].

#### 1,5-dimethoxy-3-ethylcyclohexa-1,4-diene (**4c**)

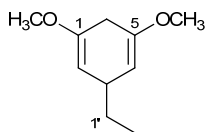

Yield = 83% as a clear colourless oil. b.p. 145°C @ 1.5mmHg; IR (neat): 3059, 2997, 2959, 2824, s. 1694, 1663, 1597, 1443, 1397, 1234, 1207, 1150 cm<sup>-1</sup>; <sup>1</sup>H NMR (300 MHz, CDCl<sub>3</sub>): δ 4.58-4.57 (2H, *m*, H-2,4), 3.57 (6H, *s*, 1,5-OCH<sub>3</sub>), 2.94 (1H, *tddd*, <sup>3</sup>*J* = 7.0, <sup>3</sup>*J* = 3.3, <sup>5</sup>*J* = 6.6, <sup>5</sup>*J* = 6.6, H-3), 2.77-2.76 (2H, *m* [apparent *d*], *J* = 6.5, H-6), 1.43 (2H, *dq*, <sup>3</sup>*J* = 7.0, <sup>3</sup>*J* = 7.0, H-1'), 0.87 (3H, *t*, <sup>3</sup>*J* = 7.0, H-2'); <sup>13</sup>C APT NMR (75 MHz, CDCl<sub>3</sub>): δ 151.9 (C, C-1,5), 65.7 (CH, C-2,4), 54.1 (CH<sub>3</sub>, 1,5-OCH<sub>3</sub>), 36.8 (C-3), 31.3 (CH<sub>2</sub>, C-6), 30.7 (CH<sub>2</sub>, C-1'), 10.4 (CH<sub>3</sub>, C-2'); *m/z* (ESI) 169.1226 [(M+H)<sup>+</sup> C<sub>10</sub>H<sub>17</sub>O<sub>2</sub> requires 169.1229 (Δ = 1.7 ppm)].

#### 1,5-dimethoxy-3-propylcyclohexa-1,4-diene (4d)

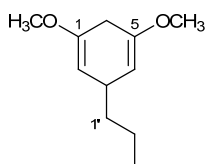

Yield = 88% as a pale yellow oil. IR (neat): 3059, 2997, 2955, 2870, 2839, s. 1693, 1659, 1609, 1462, 1204, 1150 cm<sup>-1</sup>; <sup>1</sup>H NMR (300 MHz, CDCl<sub>3</sub>): δ 4.60-4.59 (2H, *m*, H-2,4), 3.56 (6H, *s*, 1,5-OCH<sub>3</sub>), 3.03-2.93 (1H, *m*, H-3), 2.77-2.75 (2H, *m* [apparent *d*], *J* = 6.9, H-6), 1.37-1.34 (4H, *m*, H-1' and H-2'), 0.91 (3H, *t*, <sup>3</sup>*J* = 7.0, H-3'); <sup>13</sup>C APT NMR (75 MHz, CDCl<sub>3</sub>): δ 151.6 (C, C-1,5), 96.0 (CH, C-2,4), 54.1 (CH<sub>3</sub>, 1,5-OCH<sub>3</sub>), 40.6 (CH<sub>2</sub>, C-1'), 35.4 (CH<sub>2</sub>, C-3), 31.3 (CH<sub>2</sub>, C-6), 19.4 (CH<sub>2</sub>, C-2'), 14.3 (CH<sub>3</sub>, C-3'); *m/z* (ESI) 183.1383 [(M+H)<sup>+</sup> C<sub>11</sub>H<sub>19</sub>O<sub>2</sub> requires 183.1385 (Δ = 1.1 ppm)].

#### 1,5-dimethoxy-3-butylcyclohexa-1,4-diene (4e)

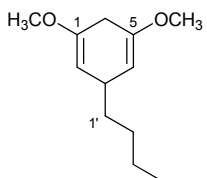

Yield = 100% as a pale yellow oil: b.p. 150°C @ 0.7mmHg; IR (neat): 3059, 2997, 2955, 2928, 2855, 1693, 1663, 1609, 1462, 1397, 1207, 1150 cm<sup>-1</sup>; <sup>1</sup>H NMR (300 MHz, CDCl<sub>3</sub>): δ 4.60 (2H, *ddd*, <sup>3</sup>*J* = 3.3,



$^4J = 1.2$ ,  $^4J = 1.2$ , H-2,4), 3.56 (6H, *s*, 1,5-OCH<sub>3</sub>), 3.03-2.91 (1H, *m*, H-3), 2.76 (2H, *m*, H-6) 1.42-1.25 (6H, *m*, H-1', H-2' and H-3'), 0.90 (3H, *t*,  $^3J = 7.2$ , H-4'); <sup>13</sup>C APT NMR (75 MHz, CDCl<sub>3</sub>): δ 151.6 (C, C-1,5), 96.1 (CH, C-2,4), 54.1 (CH<sub>3</sub>, 1,5-OCH<sub>3</sub>), 38.1 (CH<sub>2</sub>, C-1'), 35.6 (CH, C-3), 31.3 (CH<sub>2</sub>, C-6), 28.5 (CH<sub>2</sub>, C-2'), 23.0 (CH<sub>2</sub>, C-3'), 14.1 (CH<sub>3</sub>, C-4'); *m/z* (EI) 196.1463 [M<sup>+</sup> C<sub>12</sub>H<sub>20</sub>O<sub>2</sub> requires 196.1460 (Δ = 1.9 ppm)].

### 1,5-dimethoxy-3-pentylcyclohexa-1,4-diene (4f)

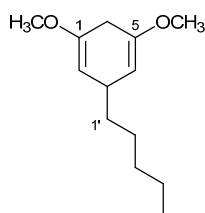

Yield = 85% as a pale yellow oil; IR (neat): 3059, 2997, 2955, 2928, 2870, *s*. 1695, 1663, 1610, 1443, 1204, 1150 cm<sup>-1</sup>; <sup>1</sup>H NMR (300 MHz, CDCl<sub>3</sub>): δ 4.59 (2H, *d*,  $^3J = 3.6$ , H-2,4), 3.56 (6H, *s*, 1,5-OCH<sub>3</sub>), 2.96 (1H, *ttdd*,  $^3J = 7.2$ ,  $^3J = 3.6$ ,  $^5J = 7.2$ ,  $^5J = 7.2$ , H-3), 2.78-2.75 (2H, *m*, [apparent *d*],  $J = 7.2$ , H-6) 1.4-1.25 (8H, *m*, H-1', H-2', H-3' and H-4'), 0.89 (3H, *t*,  $^3J = 6.9$ , H-5'); <sup>13</sup>C APT NMR (75 MHz, CDCl<sub>3</sub>): δ 151.6 (C, C-1,5), 96.1 (CH, C-2,4), 54.1 (CH<sub>3</sub>, 1,5-OCH<sub>3</sub>), 38.3 (CH<sub>2</sub>, C-1'), 35.6 (CH, C-3), 31.3 (CH<sub>2</sub>, C-6), 32.2 and 26.0 (CH<sub>2</sub>, C-2' and C-3'), 22.7 (CH<sub>2</sub>, C-4'), 14.1 (CH<sub>3</sub>, C-5'); *m/z* (ESI) 211.1696 [(M+H)<sup>+</sup> C<sub>13</sub>H<sub>23</sub>O<sub>2</sub> requires 211.1698 (Δ = 0.9 ppm)].

**Representative Procedure for preparation of 5:** Alkylations were achieved in a similar manner to previously reported methods.<sup>3</sup> A solution of **4** (1 equiv.) in dry THF (10 mL/mmol) was cooled to -78°C. *t*BuLi (1.1 equiv., 1.255 M in pentane) was added dropwise *via* syringe. The solution was stirred for 30 min at -78°C before dropwise addition of the required alkyl halide (1.6 equiv). After 10-15 min at -78°C the suspension was slowly warmed to r.t. and quenched with H<sub>2</sub>O. The aqueous residue was

extracted with Et<sub>2</sub>O, the combined organic phases dried (MgSO<sub>4</sub>) and the solvents removed *in vacuo*, returning **5**, which was immediately hydrolyzed to **1**, without separation of diastereomers.

**Representative Procedure for synthesis of 1:** With modifications on a reported method,<sup>4</sup> crude **5** (1 equiv.) was dissolved in acetone (5 mL/mmol) and aq. 2N HCl (3 equiv.) added. The resulting solution was stirred overnight at r.t. The acetone was evaporated under reduced pressure and the residue diluted (H<sub>2</sub>O), basified (aq. 1N NaOH) and washed with Et<sub>2</sub>O. The aqueous layer was reacidified (pH 1-3 aq. 2N HCl) and extracted with EtOAc. The organic phase was dried (MgSO<sub>4</sub>) and concentrated *in vacuo* to return **1** as a white solid.

#### 5-propyl-1,3-cyclohexanedione (1da)

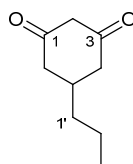

Yield = 88% as spreading colorless crystals: m.p. 95-99°C; IR (neat): br. 3310, 2957, 2930, 2872, br. 2550, 1572, 1232 cm<sup>-1</sup>; <sup>1</sup>H NMR (500 MHz, CD<sub>3</sub>OD): δ 2.40 (2H, *d*, <sup>2</sup>*J* = 12.5, H-4<sub>eq</sub>, 6<sub>eq</sub>), 2.12-2.09 (1H, *m*, H-5), 2.10 (2H, *d*, <sup>2</sup>*J* = 12.5, H-4<sub>ax</sub>, 6<sub>ax</sub>), 1.39-1.38 (4H, *m*, H-1' and H-2'), 0.93 (3H, *t*, <sup>3</sup>*J* = 7.0, H-3'); <sup>13</sup>C APT NMR (125 MHz, CD<sub>3</sub>OD): δ 104.3 (CH, C-2), 39.7 (br, CH<sub>2</sub>, C-4,6), 38.8 (CH<sub>2</sub>, C-1'), 34.9 (CH, C-5), 20.8 (CH<sub>2</sub>, C-2'), 14.4 (CH<sub>3</sub>, C-3'); *m/z* (EI) 154.0992 [*M*<sup>+</sup> C<sub>9</sub>H<sub>14</sub>O<sub>2</sub> requires 154.0994 (Δ = 0.9 ppm)], 154 (7%), 139 (1), 126 (3), 111 (23), 97 (100), 83 (82), 69 (28), 55 (83).

#### 2-methyl-5-propyl-1,3-cyclohexanedione (1db)

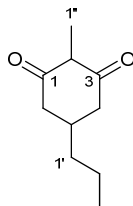

Yield = 92% over two steps. m.p. 111-115°C; IR (neat): br. 3060, 2955, 2930, 2872, br. 2650, 1572, 1383, 1242, 1088  $\text{cm}^{-1}$ ;  $^1\text{H}$  NMR (500 MHz,  $\text{CD}_3\text{OD}$ ):  $\delta$  2.44 (2H, *dd*,  $^2J = 16.5$ ,  $^3J = 4.0$ , H-4eq, 6eq), 2.13 (2H, *dd*,  $^2J = 16.5$ ,  $^3J = 11.0$ , H-4ax, 6ax), 2.06-2.01 (1H, *m*, H<sub>5</sub>), 1.63 (3H, *s*, H-1''), 1.37-1.35 (4H, *m*, H-1' and H-2'), 0.92 (3H, *t*,  $^3J = 7.0$ , H-3');  $^{13}\text{C}$  APT NMR (125 MHz,  $\text{CD}_3\text{OD}$ ):  $\delta$  111.5 (C, C-2), 38.9 ( $\text{CH}_2$ , C-1'), 34.5 (CH, C-5), 20.7 ( $\text{CH}_2$ , C-2'), 14.4 ( $\text{CH}_3$ , C-3'), 7.1 ( $\text{CH}_3$ , C-1''); *m/z* (EI) 168.1151 [ $\text{M}^+$   $\text{C}_{10}\text{H}_{16}\text{O}_2$  requires 168.1150 ( $\Delta = 0.3$  ppm)], 168 (25%), 153 (<1), 140 (6), 125 (10), 111 (2), 97 (100), 83 (10), 70 (17), 55 (43).

### 2-ethyl-5-propyl-1,3-cyclohexanedione "Chiloglottone 1" (1dc)

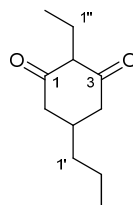

Yield = 82% over two steps. m.p. 124-126°C; IR (neat): 2957, 2928, 2872, br. 2640, 1557, 1383, 1263, 1244, 1105  $\text{cm}^{-1}$ ;  $^1\text{H}$  NMR (500 MHz,  $\text{CD}_3\text{OD}$ ):  $\delta$  2.46 (2H, *dd*,  $^2J = 16.5$ ,  $^3J = 4.3$ , H-4eq, 6eq), 2.25 (2H, *q*,  $^3J = 7.5$ , H-1''), 2.14 (2H, *dd*,  $^2J = 16.5$ ,  $^3J = 11.3$ , H-4ax, 6ax), 2.07-2.01 (1H, *m*, H-5), 1.39-1.34 (4H, *m*, H-1' and H-2'), 0.94 (3H, *t*,  $^3J = 6.5$ , H-3'), 0.90 (3H, *t*,  $^3J = 7.5$ , H-2'');  $^{13}\text{C}$  APT NMR (125 MHz,  $\text{CD}_3\text{OD}$ ):  $\delta$  176.5 (C, C-1,3), 118.5 (C, C-2), 39.3 ( $\text{CH}_2$ , C-4,6), 38.8 ( $\text{CH}_2$ , C-1'), 34.4 (CH, C-5), 20.7 ( $\text{CH}_2$ , C-2'), 16.0 ( $\text{CH}_2$ , C-1''), 14.4 and 13.6 ( $\text{CH}_3$ , C-2'', C-3'); *m/z* (EI) 182.1307 [ $\text{M}^+$   $\text{C}_{11}\text{H}_{18}\text{O}_2$  requires 182.1307 ( $\Delta = 0.1$  ppm)], 182 (39%), 167 (5), 154 (6), 139 (17), 125 (42), 111 (30), 97 (100), 84 (35), 69 (39), 55 (78).

### 2,5-dipropyl-1,3-cyclohexanedione (**1dd**)

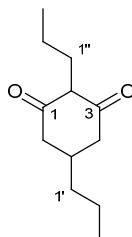

Yield = 75% over two steps. m.p. 133-138°C; IR (neat): br. 3425, 2957, 2928, 2872, br. 2640, 1566, 1383, 1240, 1233, 1113  $\text{cm}^{-1}$ ;  $^1\text{H}$  NMR (500 MHz,  $\text{CD}_3\text{OD}$ ):  $\delta$  2.44 (2H, *dd*,  $^2J = 14.0$ ,  $^3J = 3.0$ , H-4eq, 6eq), 2.19 (2H, *t*,  $^3J = 7.5$ , H-1''), 2.13 (2H, *dd*,  $^2J = 14.0$ ,  $^3J = 11.0$ , H-4ax, 6ax), 2.06-2.00 (1H, *m*, H-5), 1.38-1.35 (4H, *m*, H-1' and H-2'), 1.33 (2H, *tq* [apparent *hex*],  $^3J = 7.5$ ,  $^3J = 7.0$ , H-2''), 0.93 (3H, *t*,  $^3J = 7.0$ , H-3'), 0.85 (3H, *t*,  $^3J = 7.0$ , H-3'');  $^{13}\text{C}$  APT NMR (125 MHz,  $\text{CD}_3\text{OD}$ ):  $\delta$  116.6 (C, C-2), 38.9 ( $\text{CH}_2$ , C-1'), 34.5 (CH, C-5), 24.7 ( $\text{CH}_2$ , C-1''), 22.8 ( $\text{CH}_2$ , C-2''), 20.8 ( $\text{CH}_2$ , C-2'), 14.43 and 14.38 ( $\text{CH}_3$ , C-3' and C-3''); *m/z* (EI) 196.1457 [ $\text{M}^{+\bullet}$   $\text{C}_{12}\text{H}_{20}\text{O}_2$  requires 196.1463 ( $\Delta = 3.3$  ppm)], 196 (33%), 181 (32), 167 (32), 154 (14), 139 (29), 125 (30), 111 (67), 97 (100), 84 (40), 69 (22), 55 (82).

### 2-butyl-5-propyl-1,3-cyclohexanedione (**1de**)

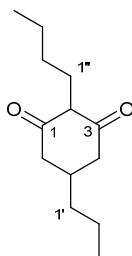

Yield = 81% over two steps. m.p. 141-146 °C; IR (neat): br. 3050, 2957, 2926, 2872, br. 2621, 1568, 1383, 1242, 1115  $\text{cm}^{-1}$ ;  $^1\text{H}$  NMR (500 MHz,  $\text{CD}_3\text{OD}$ ):  $\delta$  2.44 (2H, *dd*,  $^2J = 16.5$ ,  $^3J = 4.0$ , H-4eq, 6eq), 2.21 (2H, *t*,  $^3J = 7.0$ , H-1''), 2.13 (2H, *dd*,  $^2J = 16.5$ ,  $^3J = 11.0$ , H-4ax, 6ax), 2.06-2.00 (1H, *m*, H-5), 1.37-1.35 (4H, *m*, H-1' and H-2'), 1.29-1.26 (4H, *m*, H-2'' and H-3''), 0.93 (3H, *t*,  $^3J = 7.0$ , H-3'), 0.88 (3H, *t*,  $^3J = 7.0$ , H-4'');  $^{13}\text{C}$  APT NMR (125 MHz,  $\text{CD}_3\text{OD}$ ):  $\delta$  116.8 (C, C-2), 40.5 (br,  $\text{CH}_2$ , C-4,6),

38.9 (CH<sub>2</sub>, C-1'), 34.5 (CH, C-5), 32.0 (CH<sub>2</sub>, C-2''), 23.8 (CH<sub>2</sub>, C-3''), 22.4 (CH<sub>2</sub>, C-1''), 20.8 (CH<sub>2</sub>, C-2'), 14.5 and 14.4 (CH<sub>3</sub>, C-3' and C-4''); *m/z* (EI) 210.1618 [ $M^{+\bullet}$  C<sub>13</sub>H<sub>22</sub>O<sub>2</sub> requires 210.1620 ( $\Delta$  = 0.6 ppm)], 210 (19%), 195 (6), 181 (38), 167 (34), 155 (28), 139 (27), 125 (37), 111 (56), 97 (100), 84 (37), 69 (25), 55 (67).

### 2-pentyl-5-propyl-1,3-cyclohexanedione (1df)

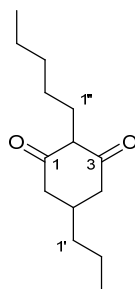

Yield = 69% over two steps. m.p. 139-143°C; IR (neat): br. 3450, 2957, 2928, 2872, br. 2633, 1568, 1385, 1242, 1115 cm<sup>-1</sup>; <sup>1</sup>H NMR (500 MHz, CD<sub>3</sub>OD):  $\delta$  2.44 (2H, *dd*, <sup>2</sup>*J* = 16.5, <sup>3</sup>*J* = 3.5, H-4<sub>eq</sub>, 6<sub>eq</sub>), 2.20 (2H, *t*, <sup>3</sup>*J* = 7.0, H-1''), 2.13 (2H, *dd*, <sup>2</sup>*J* = 16.5, <sup>3</sup>*J* = 11.0, H-4<sub>ax</sub>, 6<sub>ax</sub>), 2.05-2.00 (1H, *m*, H-5), 1.37-1.35 (4H, *m*, H-1', and H-2'), 1.32-1.22 (6H, *m*, H-2'', H-3'' and H-4''), 0.93 (3H, *t*, <sup>3</sup>*J* = 7.0, H-3'), 0.87 (3H, *t*, <sup>3</sup>*J* = 7.0, H-5''); <sup>13</sup>C APT NMR (125 MHz, CD<sub>3</sub>OD):  $\delta$  116.8 (C, C-2), 38.8 (CH<sub>2</sub>, C-1'), 34.5 (CH, C-5), 33.0 (CH<sub>2</sub>, C-3''), 29.4 (CH<sub>2</sub>, C-2''), 23.7 and 22.6 (CH<sub>2</sub>, C-1'' and C-4''), 20.8 (CH<sub>2</sub>, C-2'), 14.5 and 14.4 (CH<sub>3</sub>, C-3' and C-5''); *m/z* (EI) 224.1776 [ $M^{+\bullet}$  C<sub>14</sub>H<sub>24</sub>O<sub>2</sub> requires 224.1776 ( $\Delta$  = 0.0 ppm)], 224 (17%), 209 (5), 195 (16), 181 (50), 168 (19), 155 (46), 139 (24), 125 (23), 111 (63), 97 (100), 84 (40), 69 (23), 55 (68).

### 2-hexyl-5-propyl-1,3-cyclohexanedione (1dg)

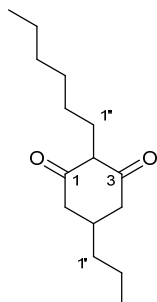

Yield = 66% over two steps. m.p. 133-136°C; IR (neat): br. 3055, 2957, 2926, 2872, br. 2645, 1568, 1383, 1242, 1117  $\text{cm}^{-1}$ ;  $^1\text{H}$  NMR (500 MHz,  $\text{CD}_3\text{OD}$ ):  $\delta$  2.44 (2H, *dd*,  $^2J = 16.5$ ,  $^3J = 4.0$ , H-4eq, 6eq), 2.20 (2H, *t*,  $^3J = 7.0$ , H-1''), 2.13 (2H, *dd*,  $^2J = 16.5$ ,  $^3J = 11.0$ , H-4ax, 6ax), 2.06-2.00 (1H, *m*, H-5), 1.37-1.35 (4H, *m*, H-1' and H-2'), 1.30-1.24 (8H, *m*, H-2'', H-3'', H-4'' and H-5''), 0.92 (3H, *t*,  $^3J = 7.0$ , H-3'), 0.88 (3H, *t*,  $^3J = 7.0$ , H-6'');  $^{13}\text{C}$  APT NMR (125 MHz,  $\text{CD}_3\text{OD}$ ):  $\delta$  116.8 (C, C-2), 38.8 ( $\text{CH}_2$ , C-1'), 34.5 (CH, C-5), 33.0 and 30.4 ( $\text{CH}_2$ , C-3'' and C-4''), 29.7 ( $\text{CH}_2$ , C-2''), 23.8 and 22.7 ( $\text{CH}_2$ , C-1'' and C-5''), 20.8 ( $\text{CH}_2$ , C-2'), 14.5 and 14.4 ( $\text{CH}_3$ , C-3' and C-6''); *m/z* (EI) 238.1936 [ $\text{M}^{+\bullet}$   $\text{C}_{15}\text{H}_{26}\text{O}_2$  requires 238.1933 ( $\Delta = 1.2$  ppm)], 238 (31%), 223 (<1), 209 (6), 195 (35), 181 (41), 168 (31), 155 (76), 139 (21), 125 (27), 111 (71), 97 (100), 84 (41), 69 (23), 55 (75).

### 2-ethyl-5-pentyl-1,3-cyclohexanedione "Chiloglottone 2" (1fc)

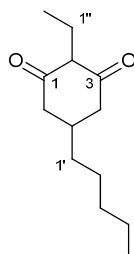

Yield = 72% over two steps. IR (neat): br. 3448, 2957, 2928, 2872, br. 2639, 1560, 1385, 1242, 1108  $\text{cm}^{-1}$ ;  $^1\text{H}$  NMR (500 MHz,  $\text{CD}_3\text{OD}$ ):  $\delta$  2.44 (2H, *dd*,  $^2J = 16.5$ ,  $^3J = 4.0$ , H-4eq, 6eq), 2.25 (2H, *q*,  $^3J = 7.5$ , H-1''), 2.13 (2H, *dd*,  $^2J = 16.5$ ,  $^3J = 11.0$ , H-4ax, 6ax), 2.05-1.98 (1H, *m*, H-5), 1.38-1.24 (8H, *m*, H-1', H-2', H-3' and H-4'), 0.94 and 0.90 (3H, *t*,  $^3J = 6.5$ , H-5' and 3H, *t*,  $^3J = 7.5$ , H-2'');  $^{13}\text{C}$  APT NMR (125 MHz,  $\text{CD}_3\text{OD}$ ):  $\delta$  118.2 (C, C-2), 36.6 and 33.1 ( $\text{CH}_2$ , C-1' and  $\text{CH}_2$ , C-3'), 34.8 (CH, C-5),

27.4 (CH<sub>2</sub>, C-2'), 23.7 (CH<sub>2</sub>, C-4'), 16.0 (CH<sub>2</sub>, C-1''), 14.5 and 13.6 (CH<sub>3</sub>, C-2'' and C-5'); *m/z* (EI) 210.1618 [ $M^{+}$  C<sub>13</sub>H<sub>22</sub>O<sub>2</sub> requires 210.1620 ( $\Delta = 1.9$  ppm)], 210 (36%), 183 (12), 169 (9), 153 (27), 139 (43), 125 (82), 112 (50), 111 (35), 97 (35), 84 (45), 69 (52), 55 (100), 43 (47), 41 (50).

**2-ethyl-5-pentyl-1,3-cyclohexanedione “Chiloglottone 3” (1be)**

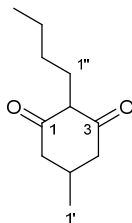

Yield = 55% over two steps: IR (neat): 2955, 2930, 2870, br. 2640, 1555, 1383, 1260, 1095 cm<sup>-1</sup>; <sup>1</sup>H NMR (500 MHz, CD<sub>3</sub>OD):  $\delta$  2.42 (2H, *d*, <sup>2</sup>*J* = 13.5, H-4eq, 6eq), 2.24 (2H, *q*, <sup>3</sup>*J* = 7.0, H-1''), 2.17-2.09 (3H, *m*, H-4ax, 6ax and H-5), 1.33-1.24 (4H, *m*, H-2'' and H-3''), 1.07 (3H, *d*, <sup>3</sup>*J* = 4.5, H-1'), 0.90 (3H, *t*, <sup>3</sup>*J* = 7.0, H-4''); <sup>13</sup>C APT NMR (125 MHz, CD<sub>3</sub>OD):  $\delta$  116.7 (C, C-2), 32.1 (CH<sub>2</sub>, C-2''), 29.9 (CH, C-5), 23.8 (CH<sub>2</sub>, C-3''), 22.5 (CH<sub>2</sub>, C-1''), 21.2 (CH<sub>3</sub>, C-1'), 14.5 (CH<sub>3</sub>, C-4''); *m/z* (EI) 182.1310 [ $M^{+}$  C<sub>11</sub>H<sub>18</sub>O<sub>2</sub> requires 182.1307 ( $\Delta = 1.81$  ppm)], 182 (4%), 165 (3), 153 (16), 140 (18), 126 (20), 111 (27), 98 (30), 84 (48), 69 (85), 55 (92), 41 (100).

**5-propyl-1,3-cyclohexanedione (1da)**

$^1\text{H}$  NMR, 500 MHz,  $\text{CD}_3\text{OD}$

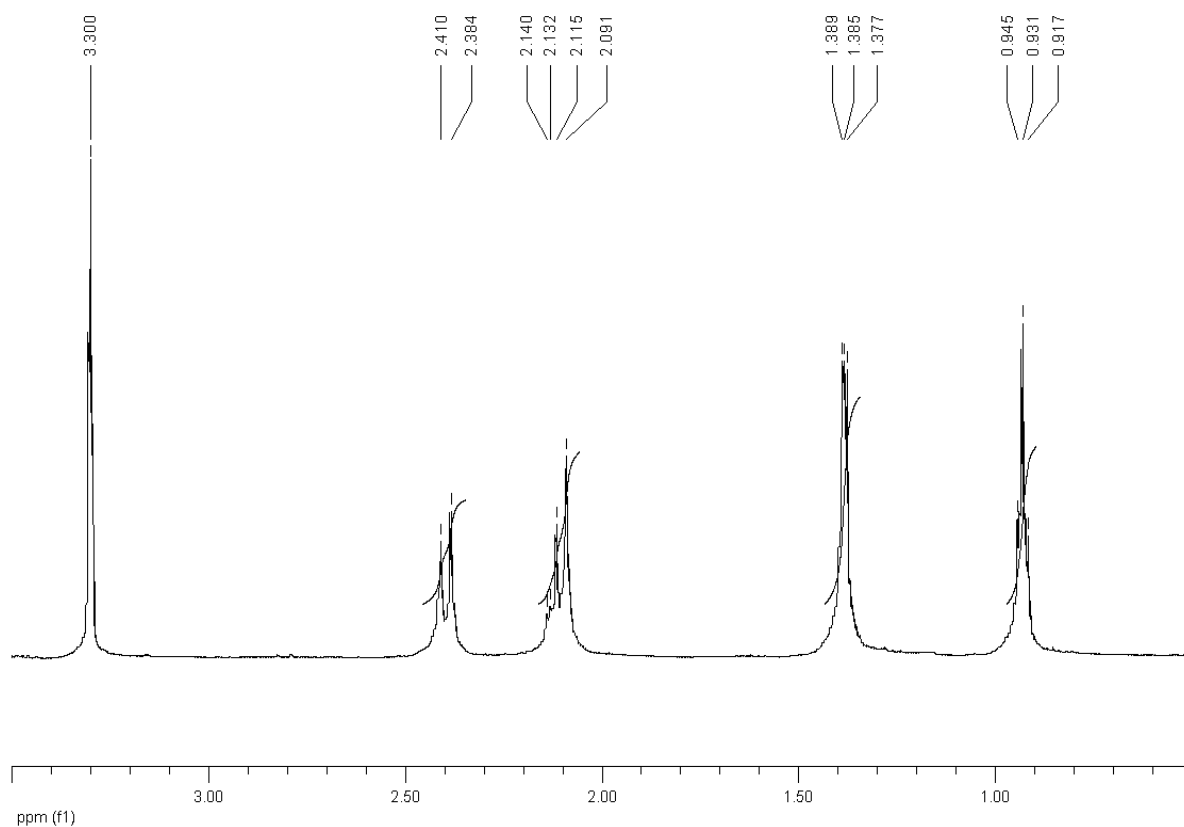

$^{13}\text{C}$  NMR, 125 MHz,  $\text{CD}_3\text{OD}$



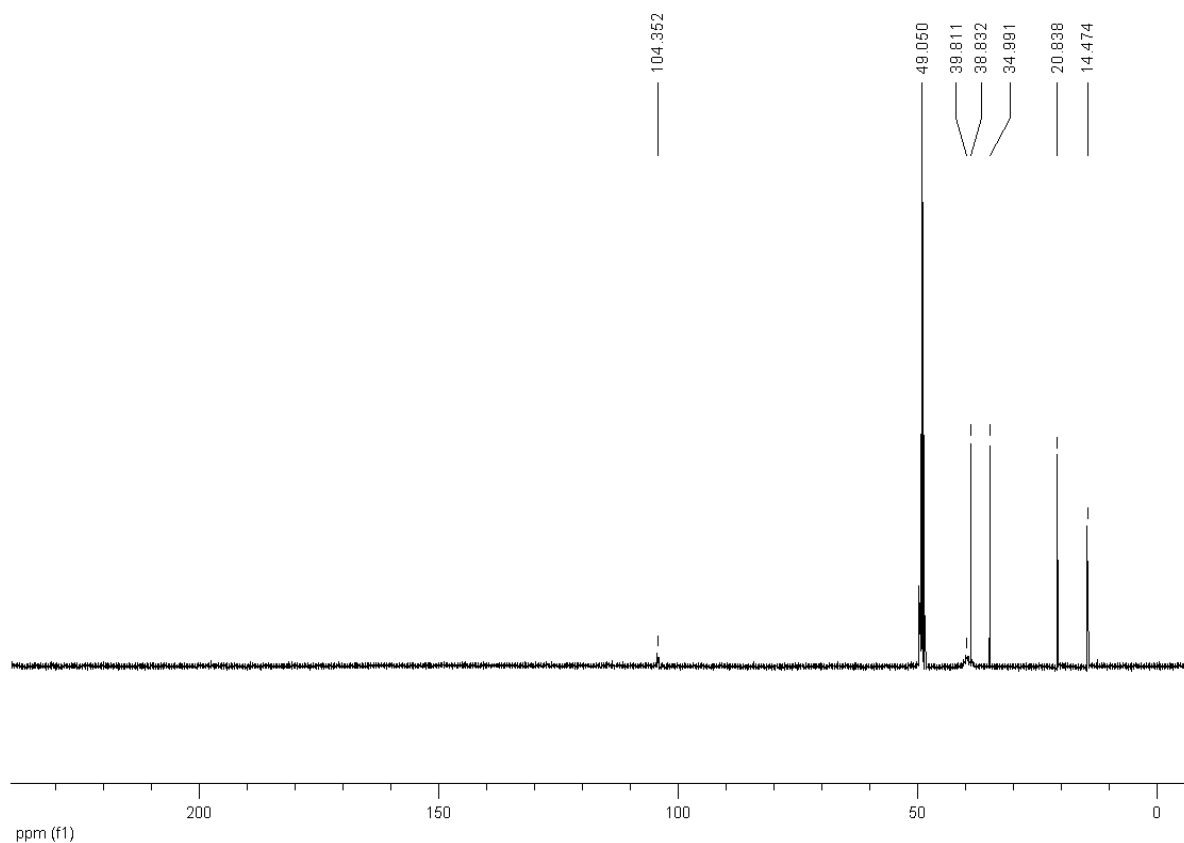

**2-methyl-5-propyl-1,3-cyclohexanedione (1db)**

<sup>1</sup>H NMR, 500 MHz, CD<sub>3</sub>OD

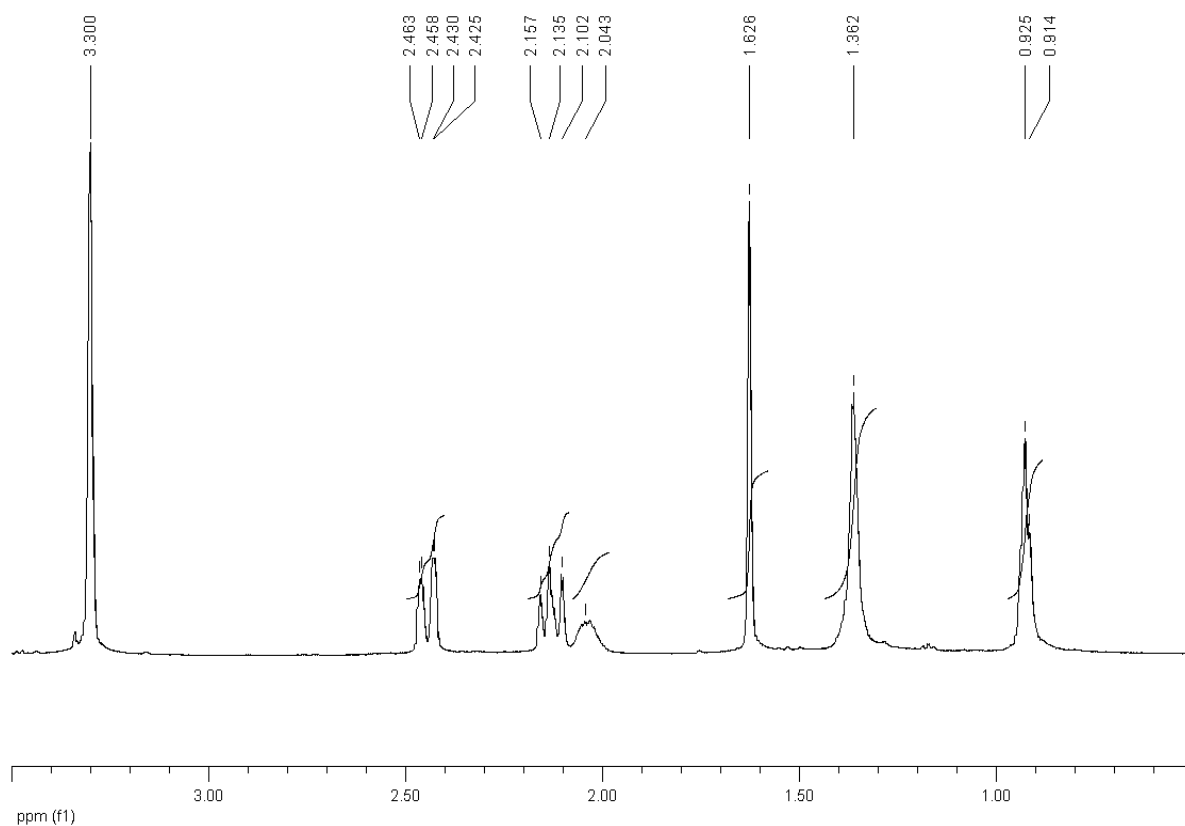

$^{13}\text{C}$  NMR, 125 MHz,  $\text{CD}_3\text{OD}$

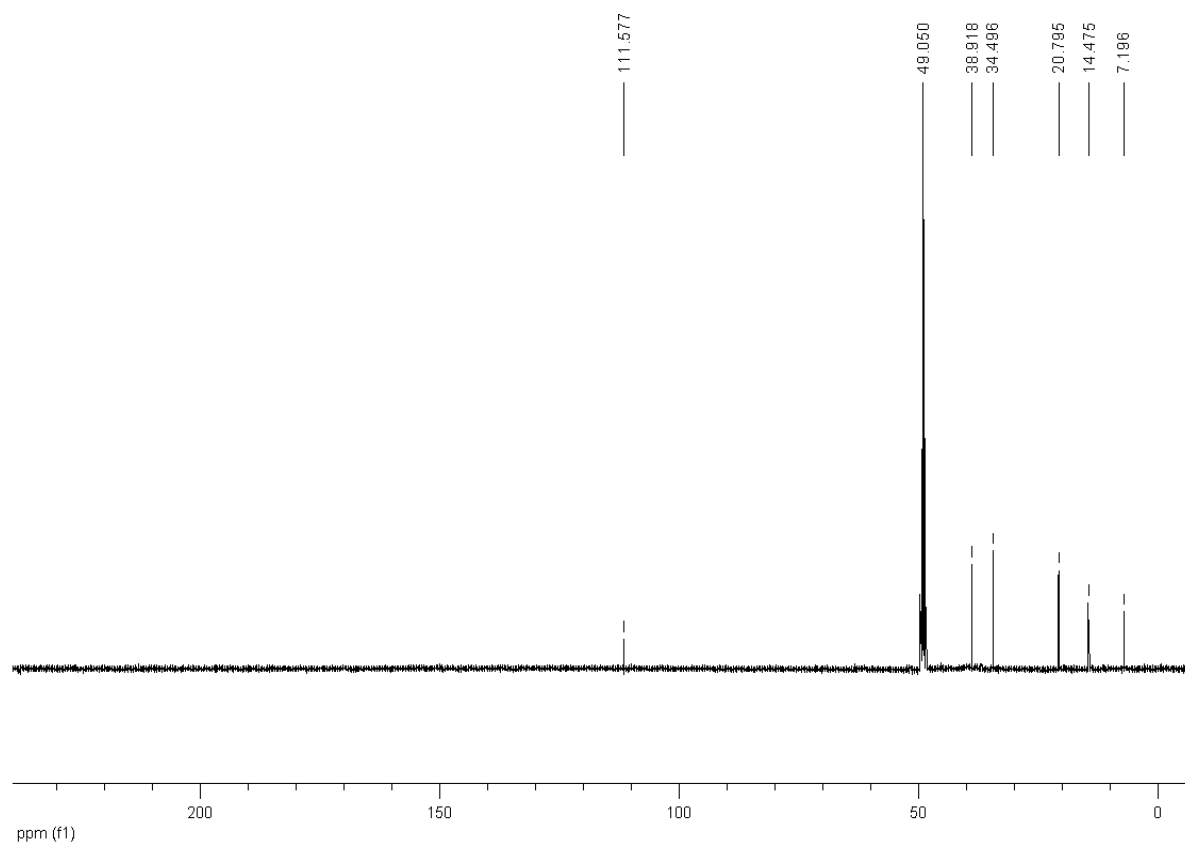

**2-ethyl-5-propyl-1,3-cyclohexanedione "Chiloglottone 1" (1dc)**

$^1\text{H}$  NMR, 500 MHz,  $\text{CD}_3\text{OD}$

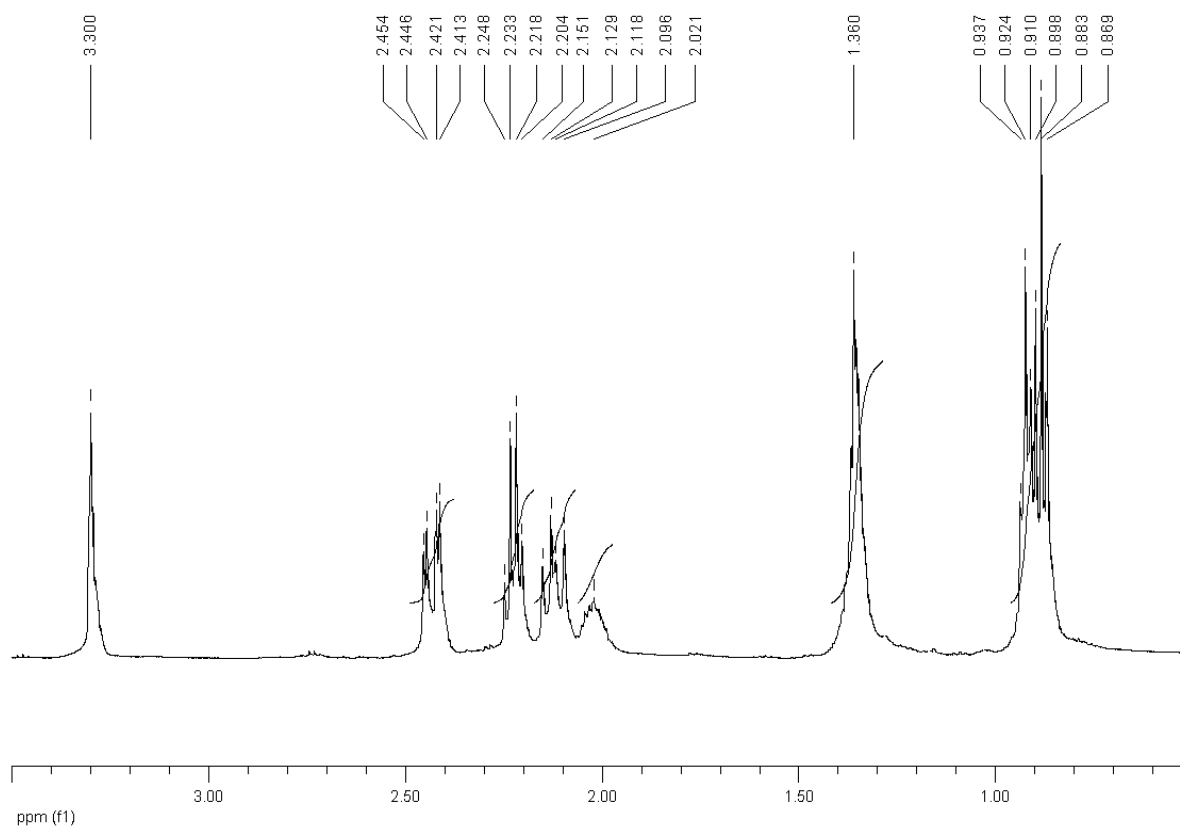

$^{13}\text{C}$  APT NMR, 125 MHz,  $\text{CD}_3\text{OD}$

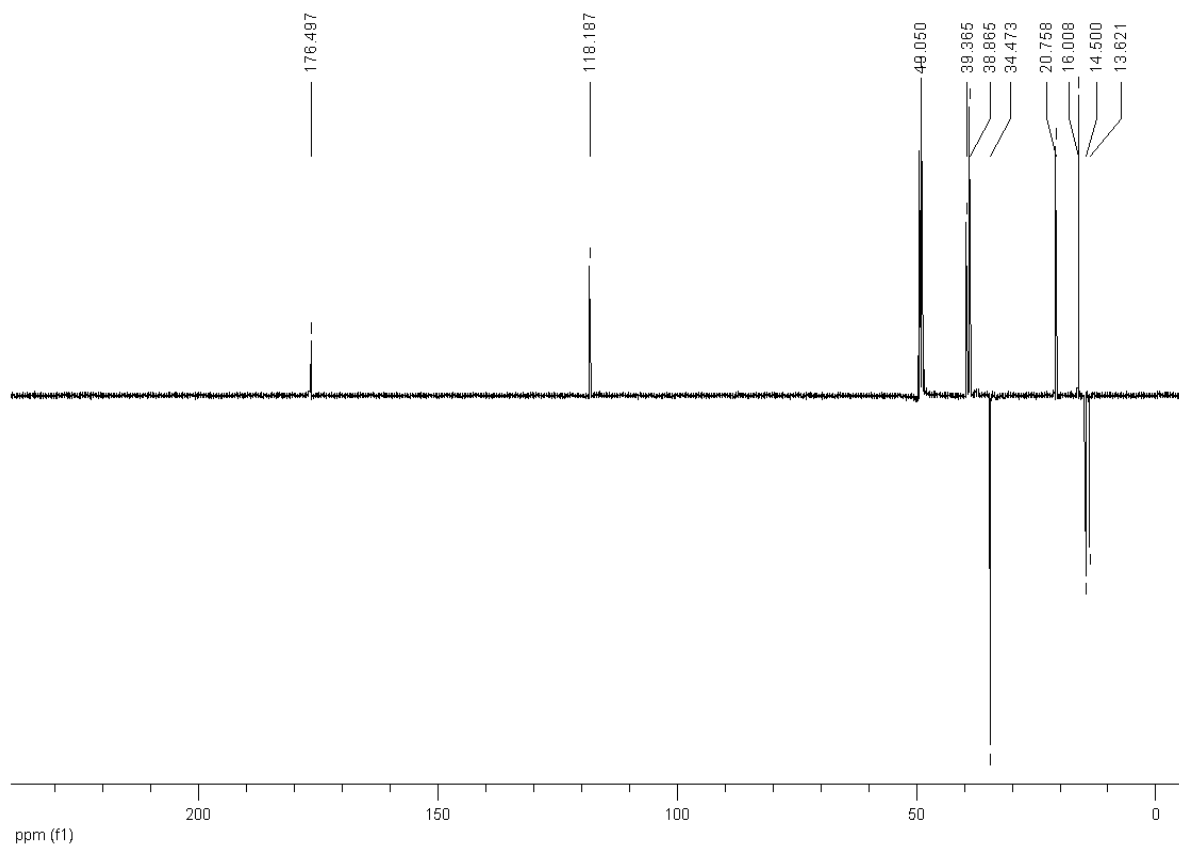

**2,5-dipropyl-1,3-cyclohexanedione (1dd)**

<sup>1</sup>H NMR, 500 MHz, CD<sub>3</sub>OD

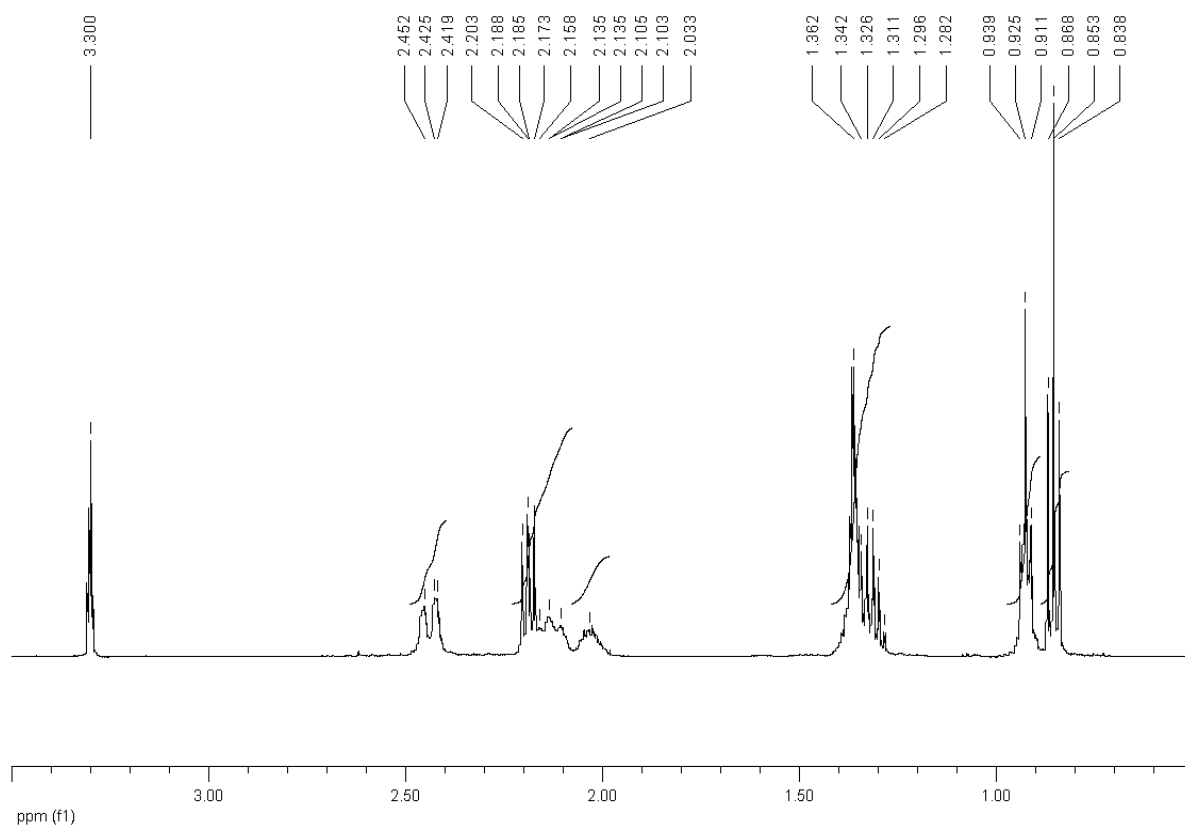

$^{13}\text{C}$  NMR, 125 MHz,  $\text{CD}_3\text{OD}$

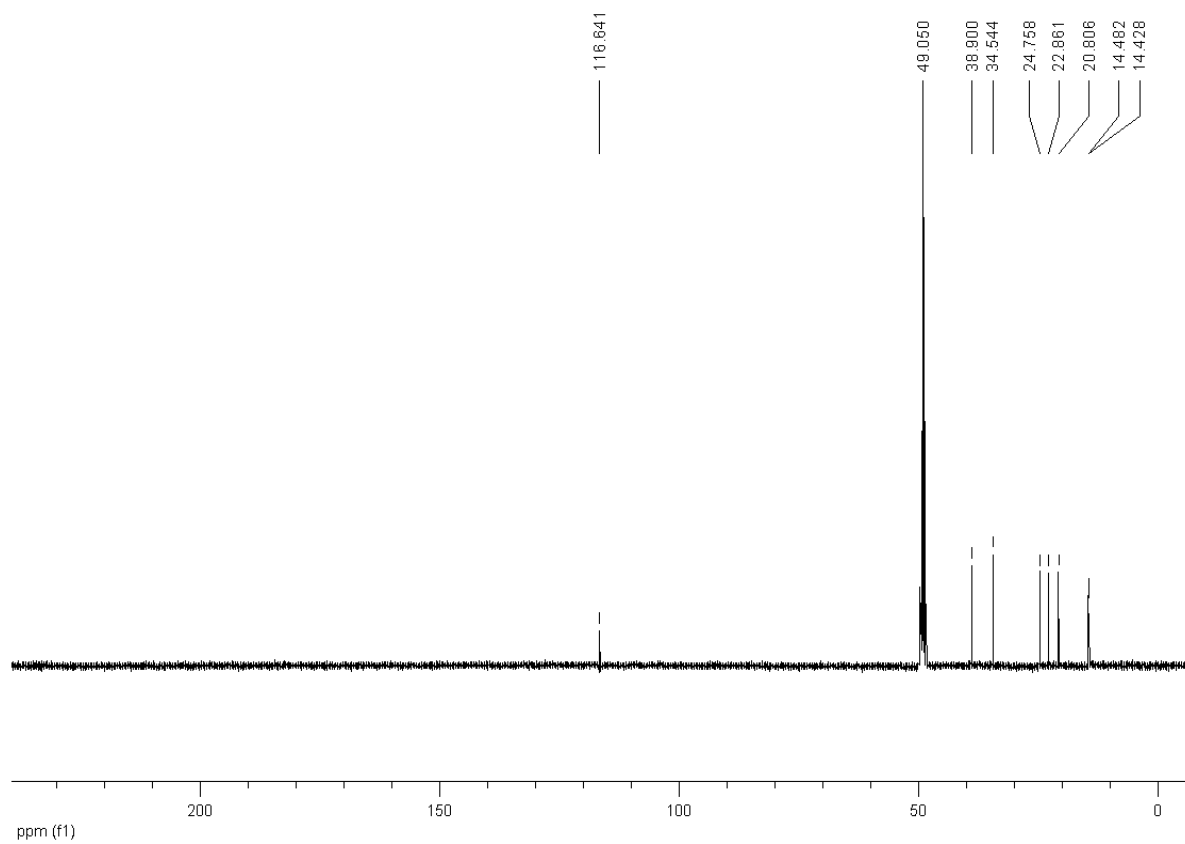

**2-butyl-5-propyl-1,3-cyclohexanedione (1de)**

$^1\text{H}$  NMR, 500 MHz,  $\text{CD}_3\text{OD}$

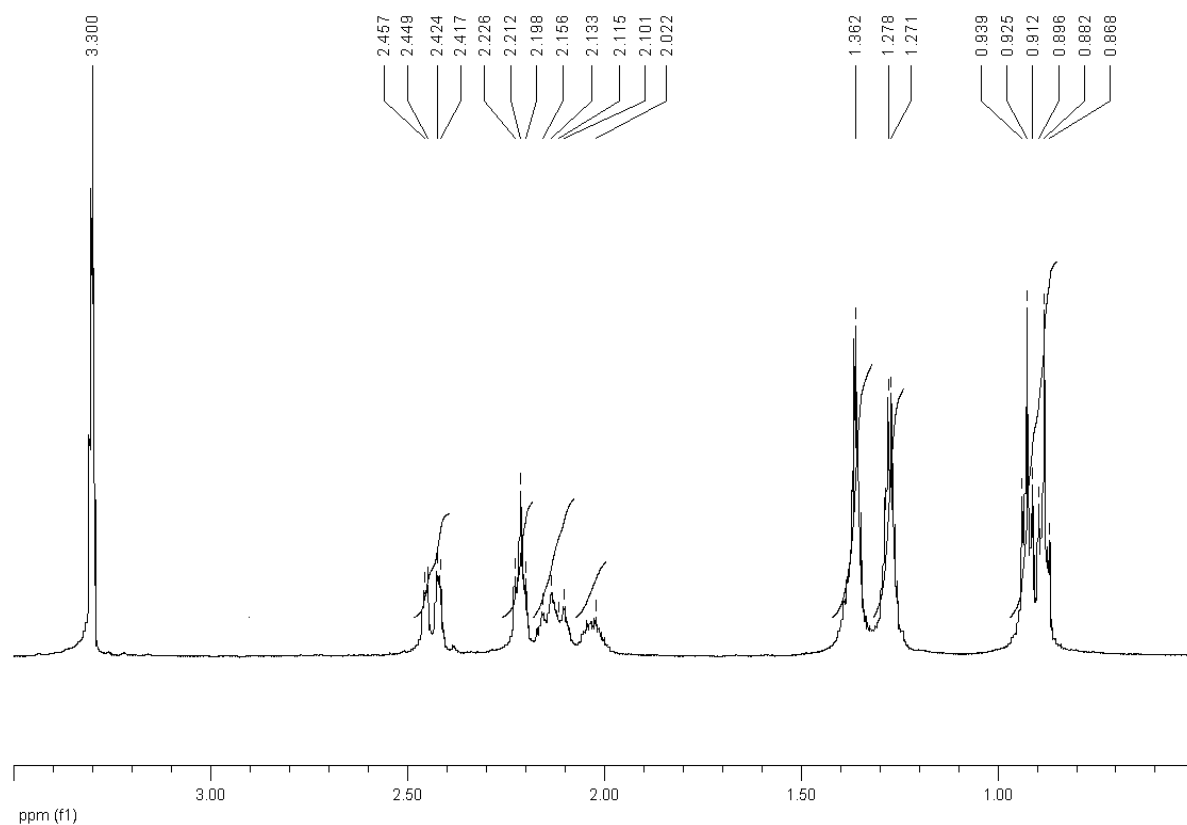

$^{13}\text{C}$  NMR, 125 MHz,  $\text{CD}_3\text{OD}$

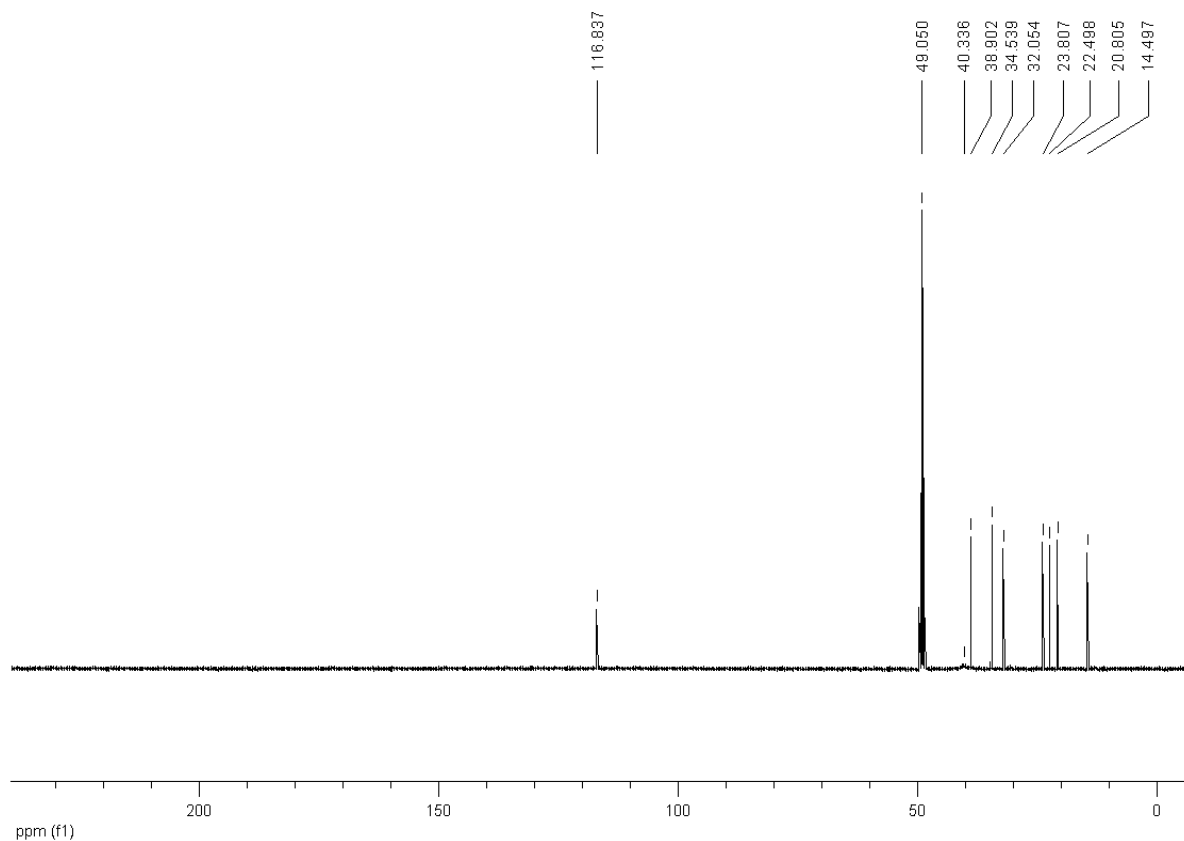

**2-pentyl-5-propyl-1,3-cyclohexanedione (1df)**

<sup>1</sup>H NMR, 500 MHz, CD<sub>3</sub>OD

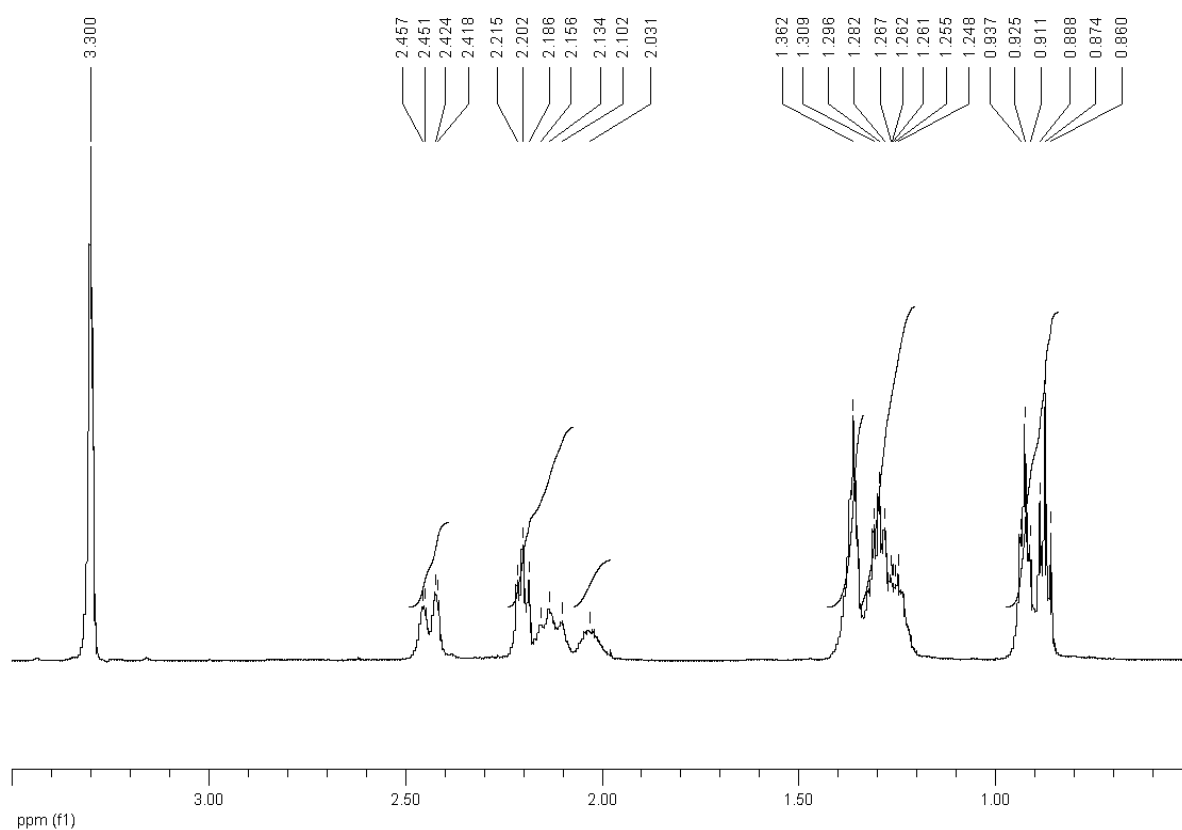

<sup>13</sup>C NMR, 125 MHz, CD<sub>3</sub>OD

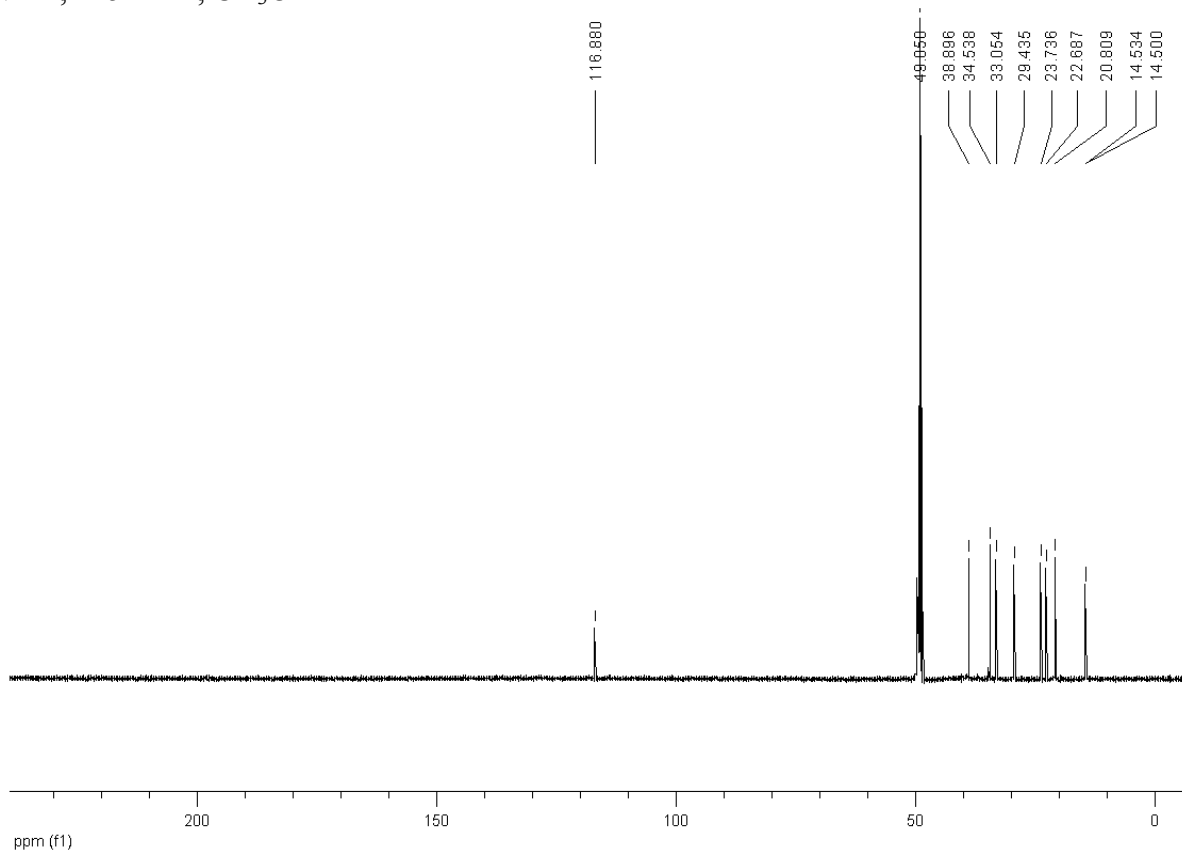



**2-hexyl-5-propyl-1,3-cyclohexanedione (1dg)**

$^1\text{H}$  NMR, 500 MHz,  $\text{CD}_3\text{OD}$

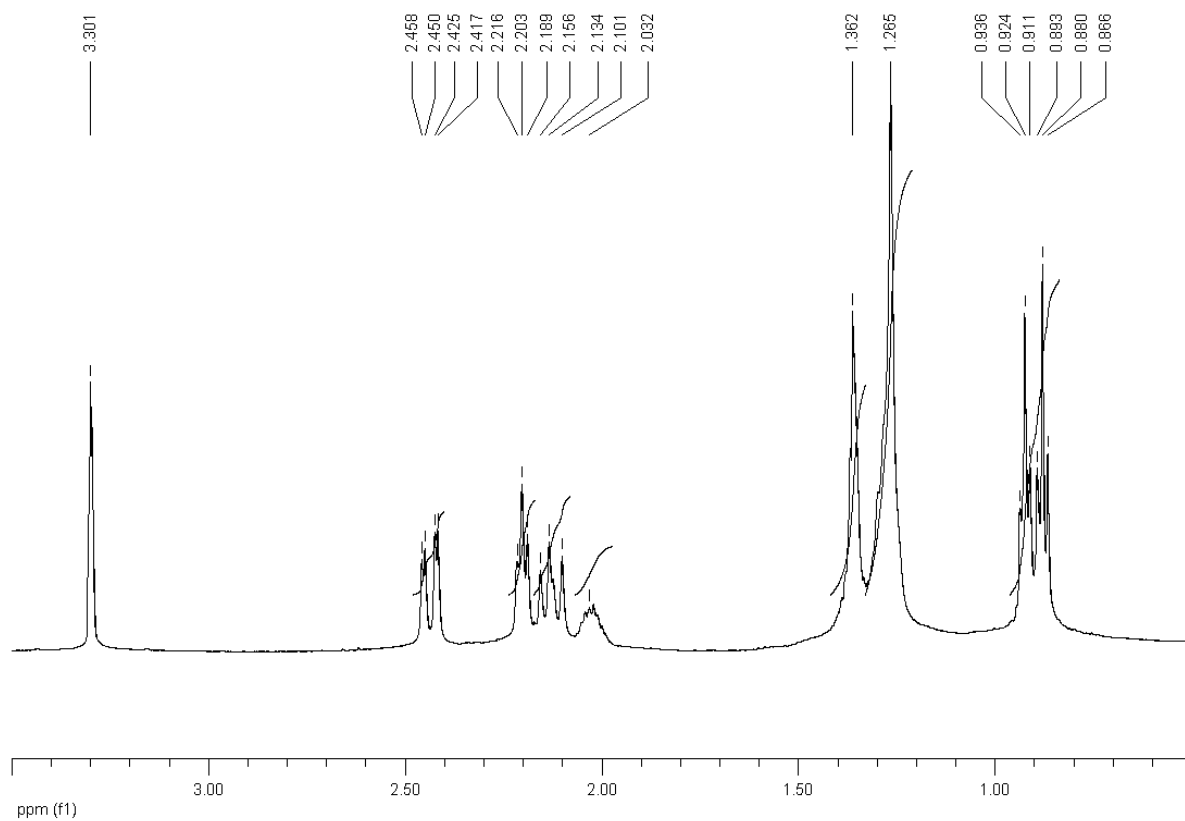

$^{13}\text{C}$  NMR, 125 MHz,  $\text{CD}_3\text{OD}$

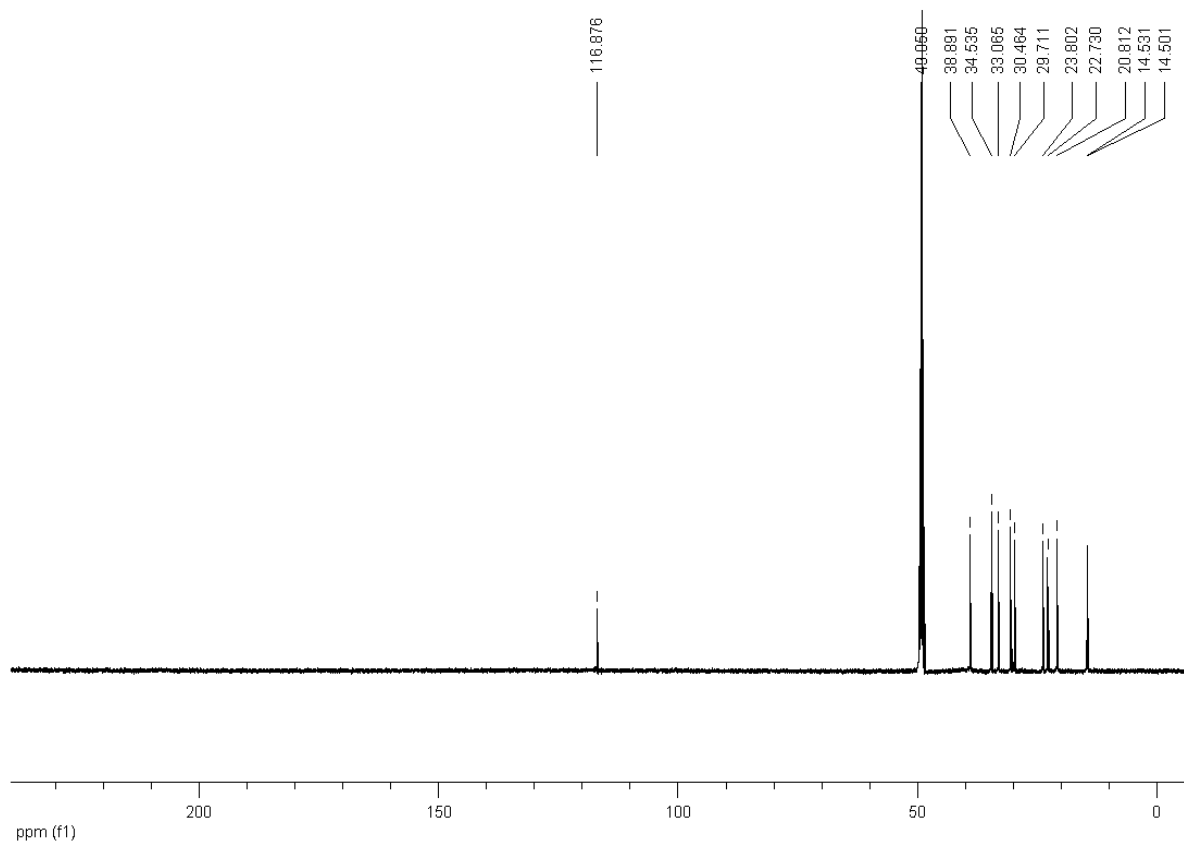

**2-ethyl-5-pentyl-1,3-cyclohexanedione "Chiloglottone 2" (1c)**

<sup>1</sup>H NMR, 500 MHz, CD<sub>3</sub>OD

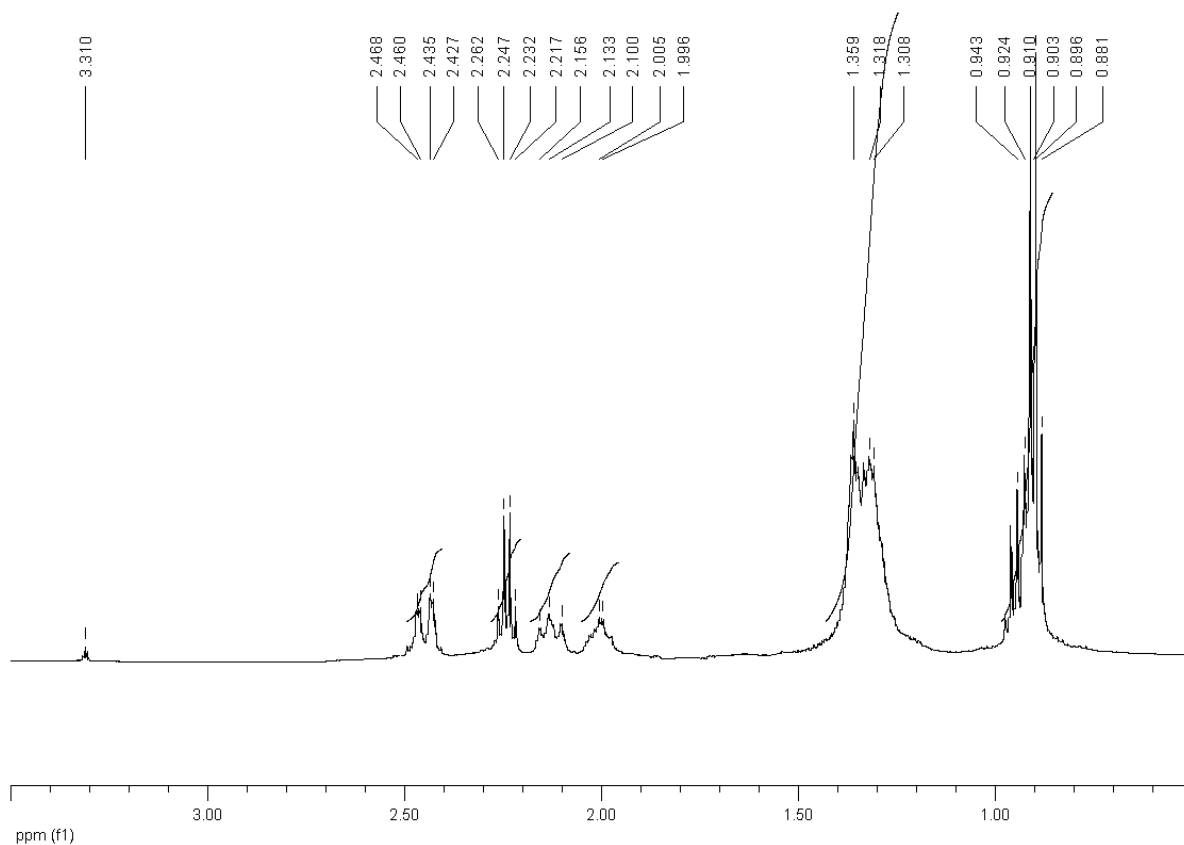

$^{13}\text{C}$  NMR, 125 MHz,  $\text{CD}_3\text{OD}$

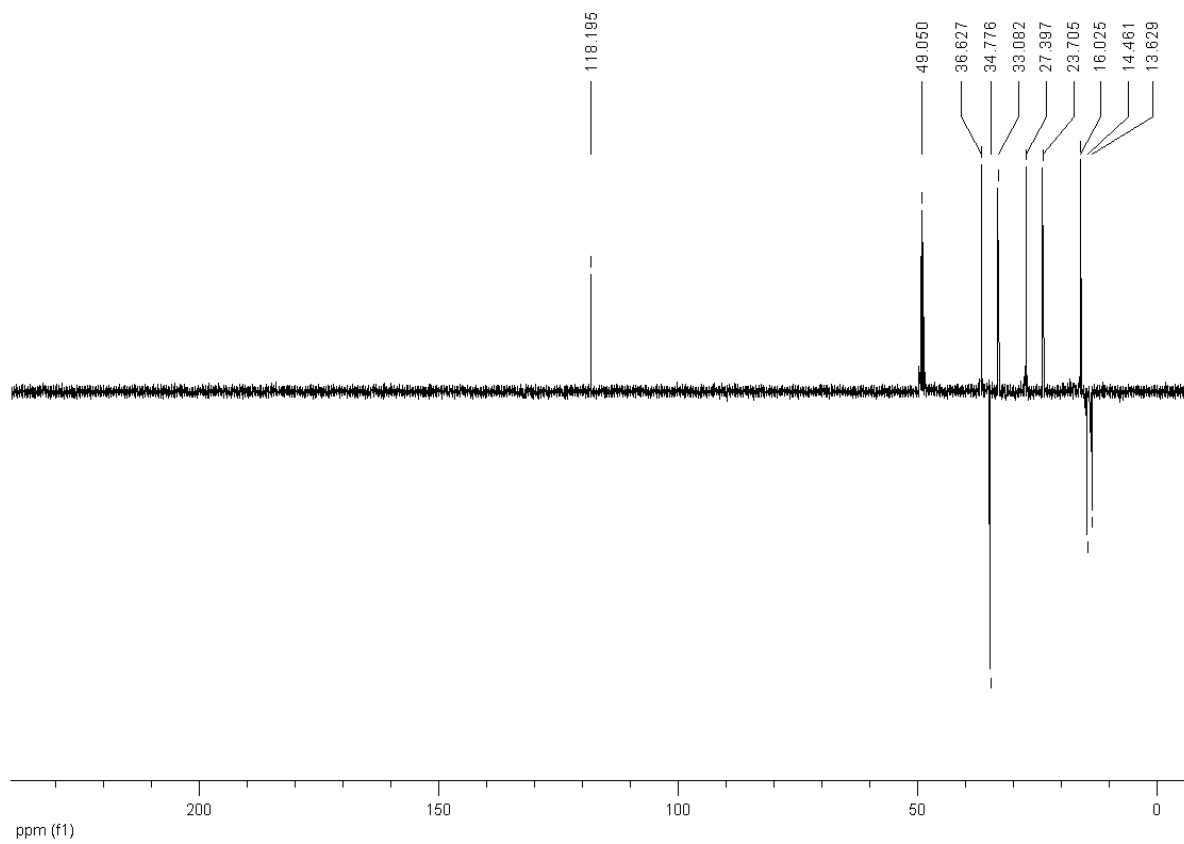

**2-ethyl-5-pentyl-1,3-cyclohexanedione “Chiloglottone 3” (1be)**

$^1\text{H}$  NMR, 500 MHz,  $\text{CD}_3\text{OD}$

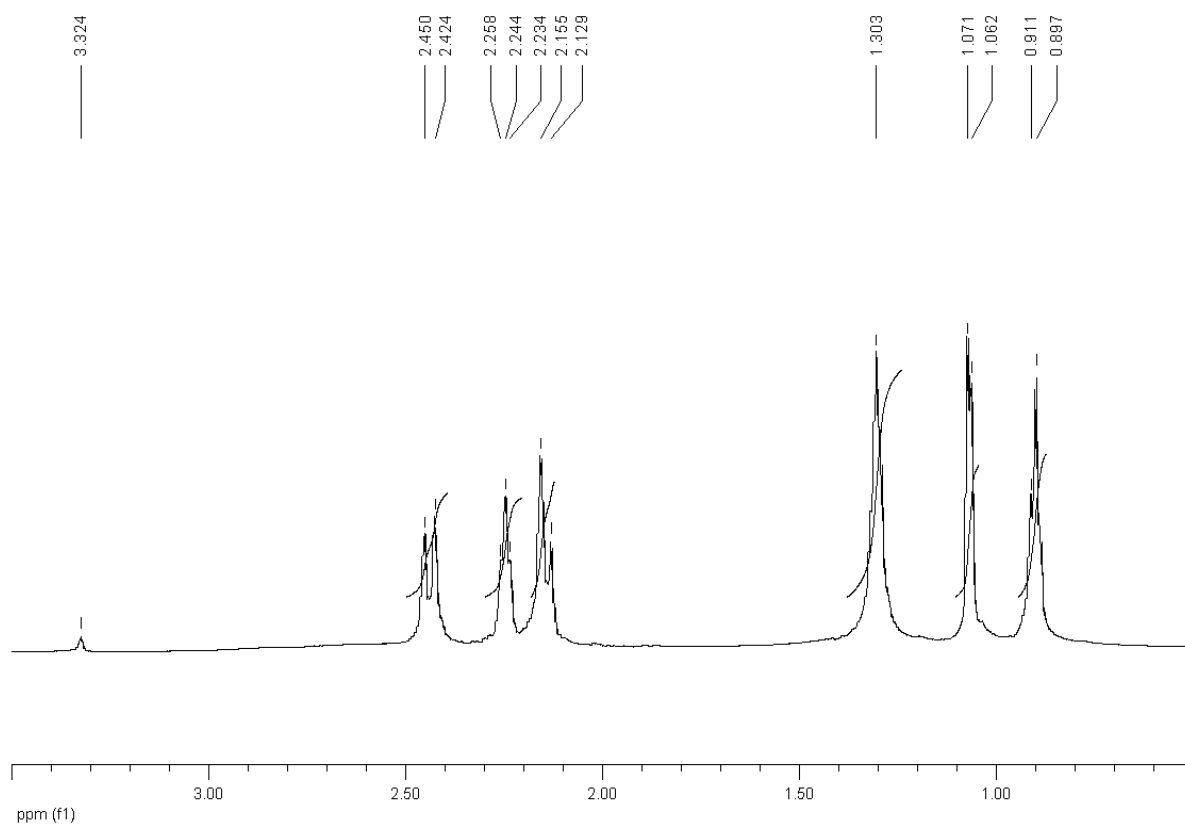

$^{13}\text{C}$  NMR, 125 MHz,  $\text{CD}_3\text{OD}$

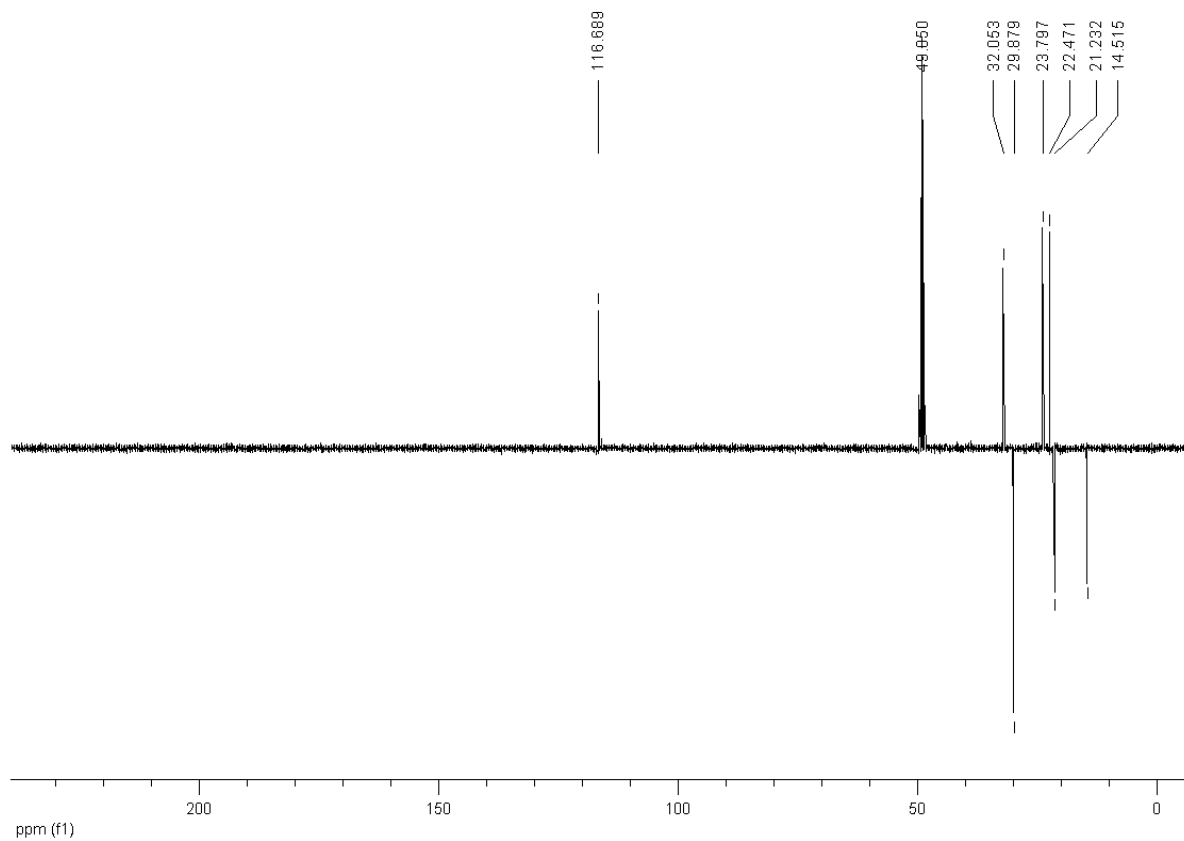

**1,5-dimethoxy-3-ethylcyclohexa-1,4-diene (4c)**

<sup>1</sup>H NMR, 300 MHz, CDCl<sub>3</sub>

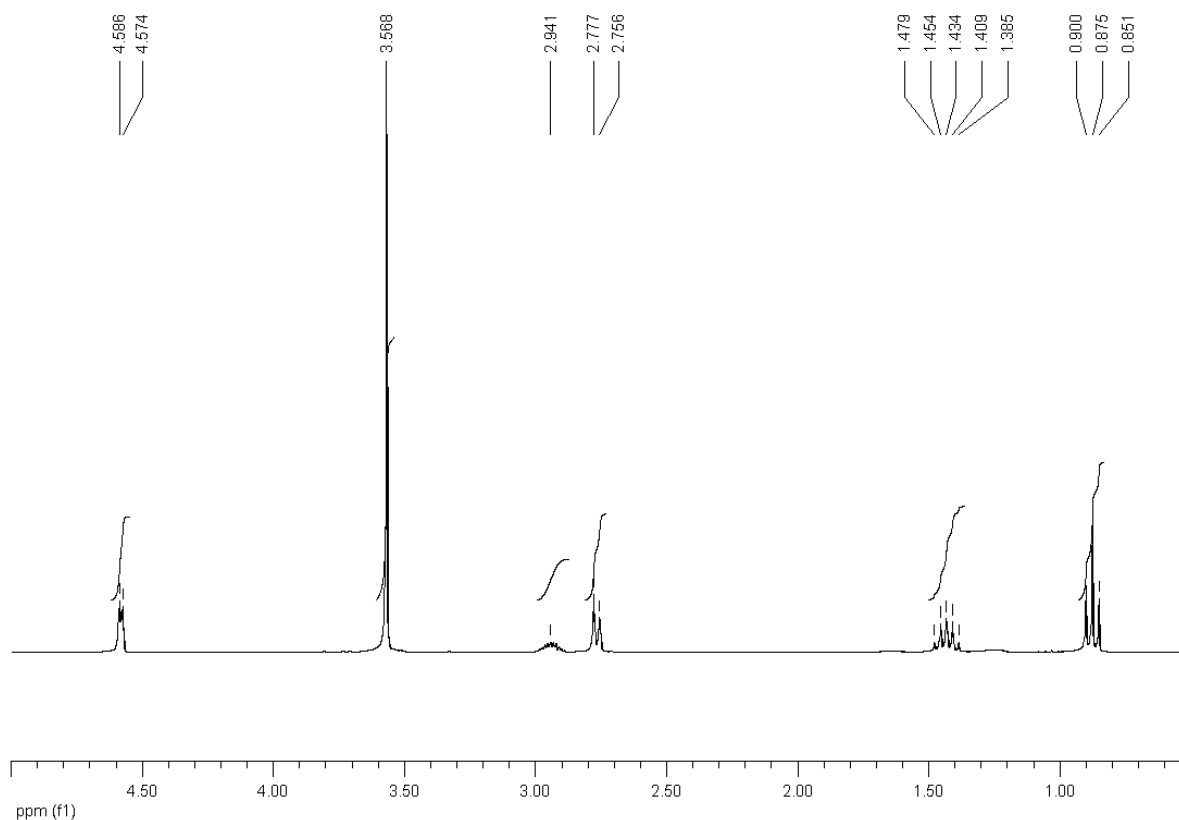

$^{13}\text{C}$  APT NMR, 75 MHz,  $\text{CDCl}_3$

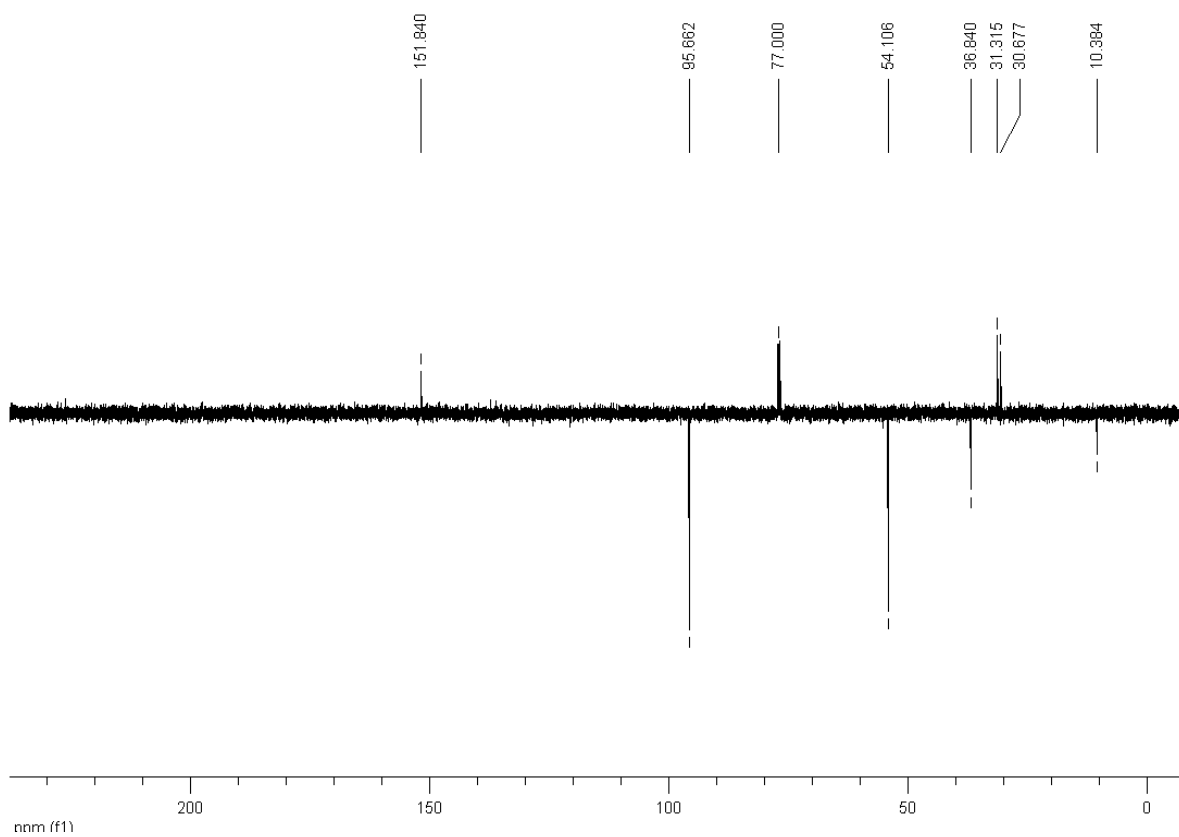

**1,5-dimethoxy-3-propylcyclohexa-1,4-diene (4d)**

$^1\text{H}$  NMR, 300 MHz,  $\text{CDCl}_3$

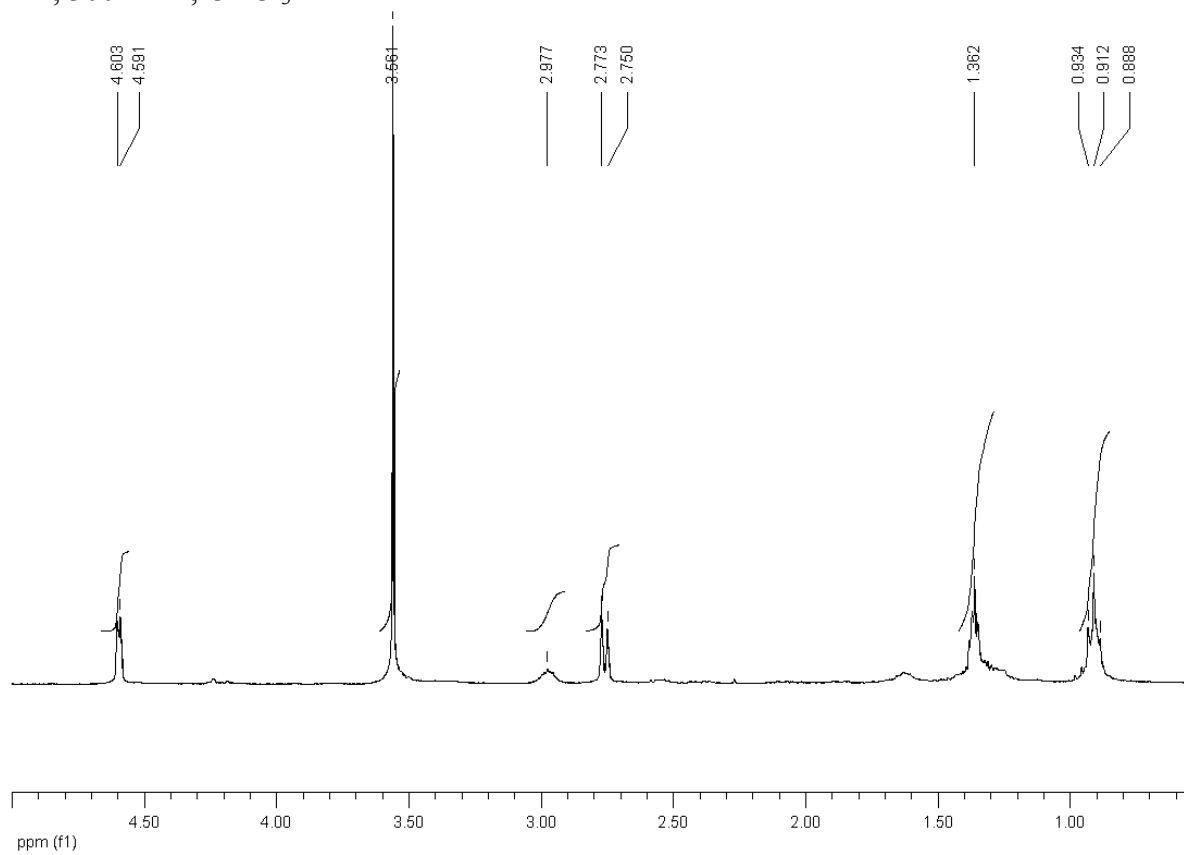

$^{13}\text{C}$  NMR, 75 MHz,  $\text{CDCl}_3$

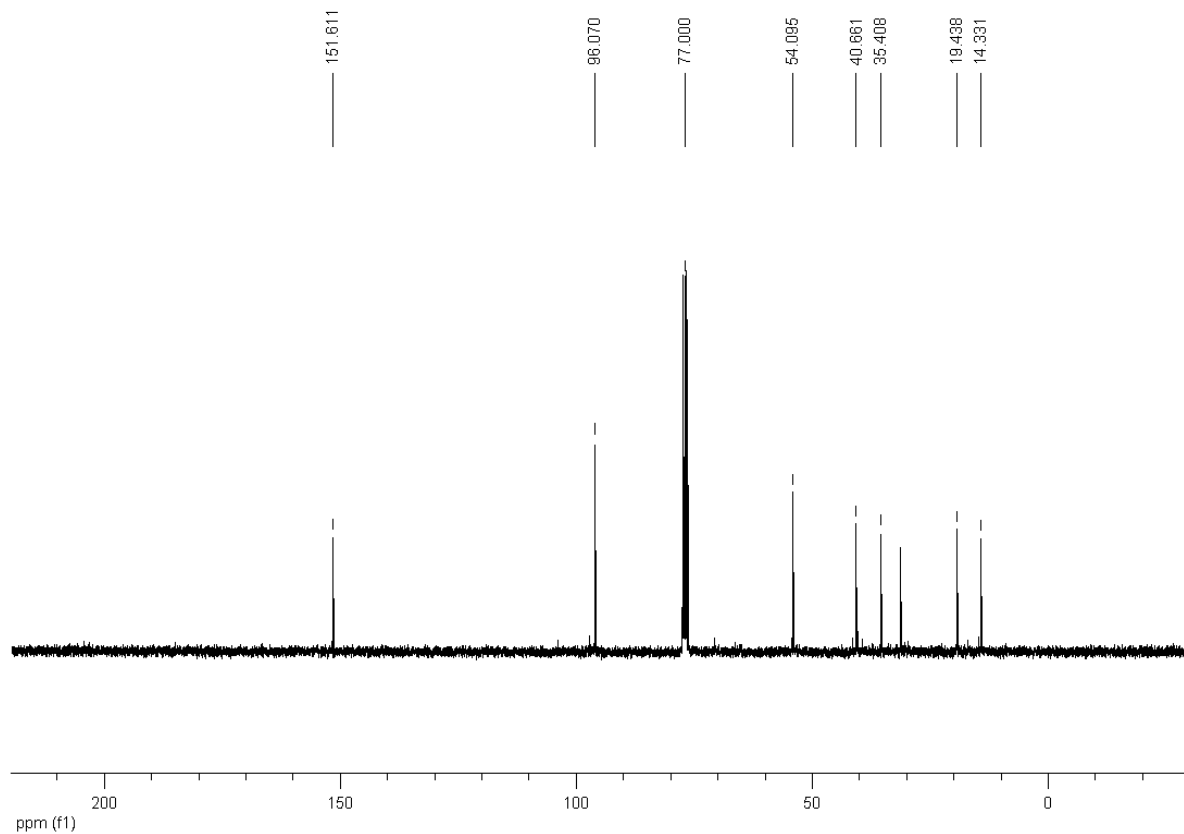

**1,5-dimethoxy-3-butylcyclohexa-1,4-diene (4e)**

<sup>1</sup>H NMR, 300 MHz, CDCl<sub>3</sub>



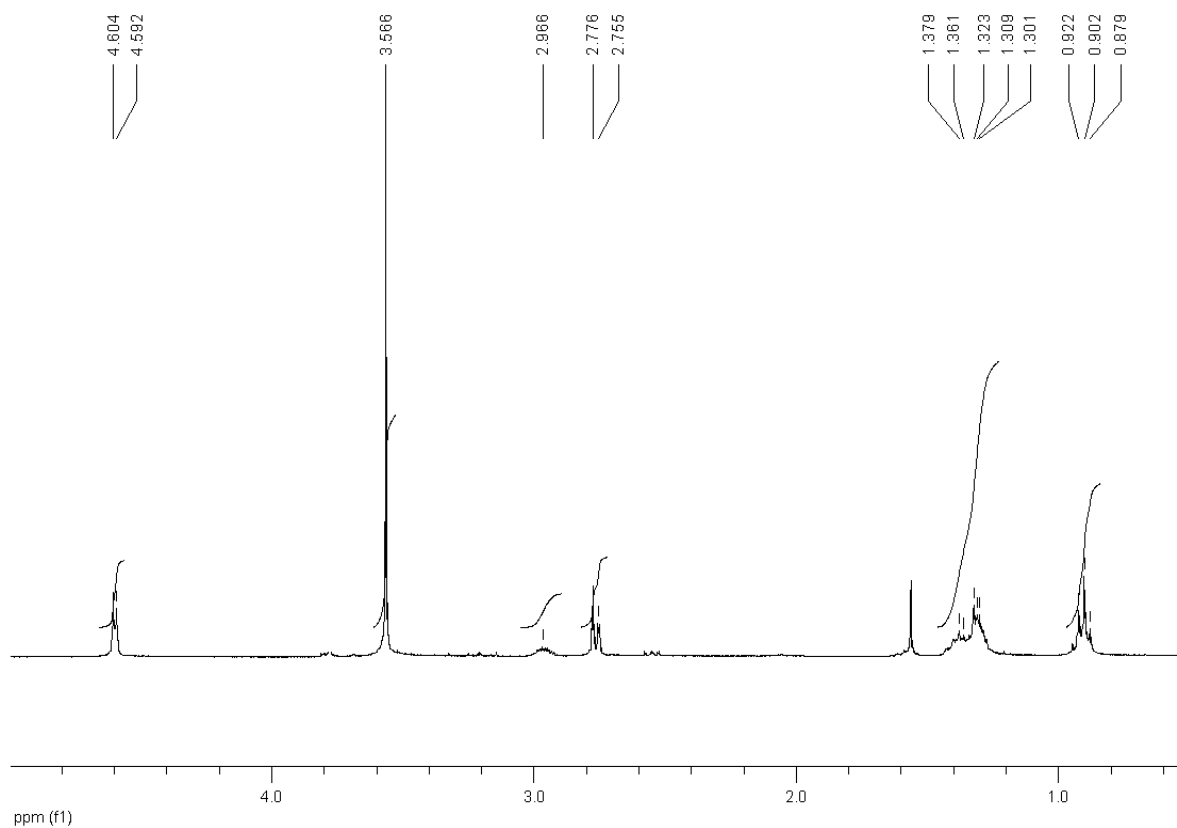

$^{13}\text{C}$  NMR, 75 MHz,  $\text{CDCl}_3$

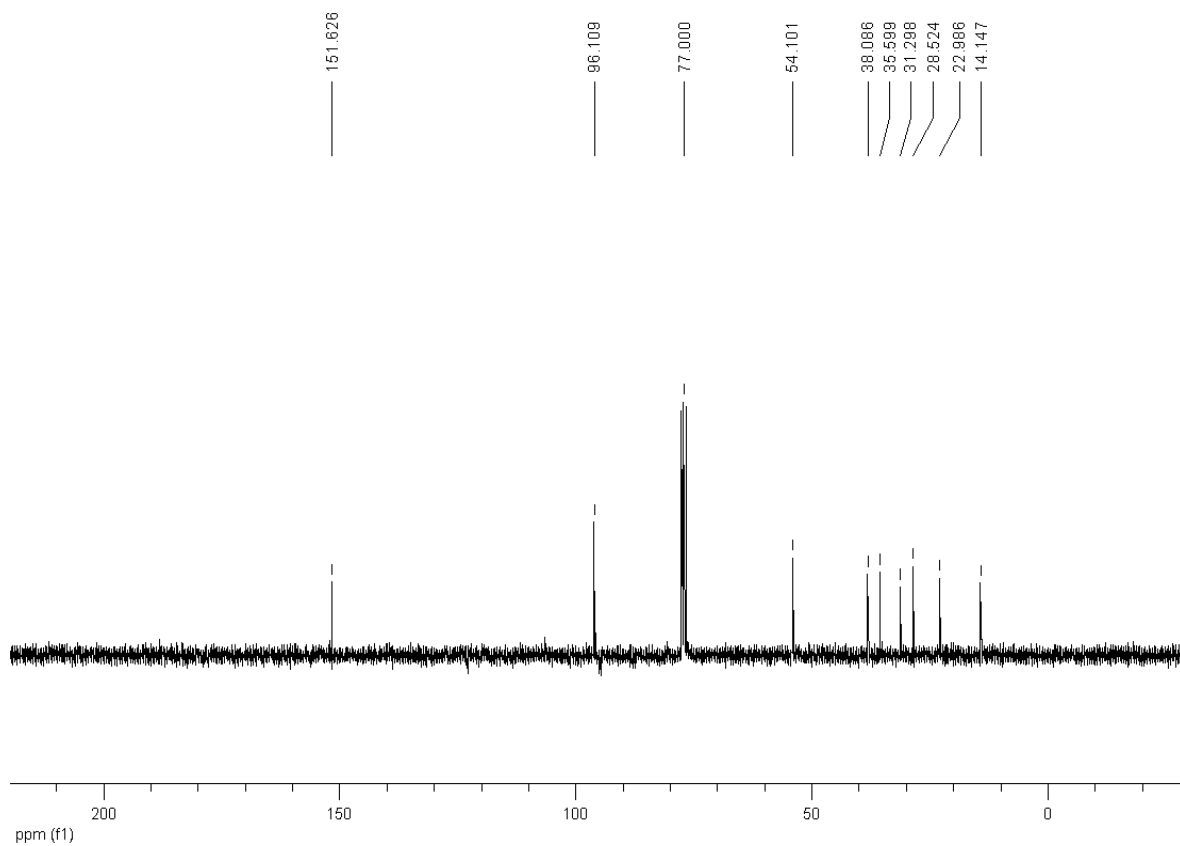

<sup>1</sup> M. J. Gunter and L. N. Mander, *Aust. J. Chem.*, 1981, **34**, 675-678.

<sup>2</sup> A. J. Leipa, J. S. Wilkie and K. N. Winzenberg, *Aust. J. Chem.*, 1989, **42**, 1217-1225.

<sup>3</sup> F. J. Sardina, A. D. Johnston, A. Mourino and W. H. Okamura, *J. Org. Chem.*, 1982, **47**, 1576-1578.

<sup>4</sup> E. Piers and J. R. Grierson, *J. Org. Chem.*, 1977, **42**, 3755-3757.
